# 1 **Morphological and genomic shifts in mole-rat ‘queens’ increase fecundity but reduce** 2 **skeletal integrity**

3  
4 Rachel A. Johnston<sup>1\*</sup>, Philippe Vulloud<sup>2</sup>, Jack Thorley<sup>2</sup>, Henry Kirveslahti<sup>4</sup>, Leyao Shen<sup>3</sup>,  
5 Sayan Mukherjee<sup>4,5,6,7</sup>, Courtney Karner<sup>3,8</sup>, Tim Clutton-Brock<sup>2,9</sup>, Jenny Tung<sup>1,10,11\*</sup>

6  
7 <sup>1</sup>Department of Evolutionary Anthropology, Duke University, Durham, North Carolina 27708,  
8 USA

9 <sup>2</sup>Department of Zoology, University of Cambridge, Cambridge CB23EJ, UK

10 <sup>3</sup>Department of Orthopaedic Surgery, Duke Orthopaedic Cellular, Developmental, and Genome  
11 Laboratories, Duke University School of Medicine, Durham, NC 27710, USA

12 <sup>4</sup>Department of Statistical Science, Duke University, Durham, NC 27708, USA

13 <sup>5</sup>Department of Computer Science, Duke University, Durham, NC 27708, USA

14 <sup>6</sup>Department of Mathematics, Duke University, Durham, NC 27708, USA

15 <sup>7</sup>Department of Bioinformatics & Biostatistics, Duke University, Durham, NC 27708, USA

16 <sup>8</sup>Department of Cell Biology, Duke University, Durham, NC 27710, USA

17 <sup>9</sup>Department of Zoology and Entomology, Mammal Research Institute, University of Pretoria,  
18 0028, Pretoria, South Africa

19 <sup>10</sup>Department of Biology, Duke University, Durham, North Carolina 27708, USA

20 <sup>11</sup>Duke Population Research Institute, Duke University, Durham, NC 27708, USA

21 \*Correspondence: racheljohnston7@gmail.com, jt5@duke.edu

22

## 23 **Abstract**

24 In some mammals and many social insects, highly cooperative societies are characterized by  
25 reproductive division of labor, in which breeders and nonbreeders become behaviorally and  
26 morphologically distinct. While differences in behavior and growth between breeders and  
27 nonbreeders have been extensively described, little is known of their molecular underpinnings.  
28 Here, we investigate the consequences of breeding for skeletal morphology and gene regulation  
29 in highly cooperative Damaraland mole-rats. By experimentally assigning breeding ‘queen’  
30 status versus nonbreeder status to age-matched littermates, we confirm that queens experience  
31 vertebral growth that likely confers advantages to fecundity. However, they also up-regulate  
32 bone resorption pathways and show reductions in femoral mass, which predicts increased  
33 vulnerability to fracture. Together, our results show that, as in eusocial insects, reproductive  
34 division of labor in mole-rats leads to gene regulatory rewiring and extensive morphological  
35 plasticity. However, in mole-rats, concentrated reproduction is also accompanied by costs to  
36 bone strength.

37

## 38 **Introduction**

39 A hallmark of highly cooperative societies is reproductive division of labor. This  
40 phenomenon is best understood in eusocial insects, where environmental cues lead to  
41 reproductively and morphologically specialized castes, including one or few highly fecund  
42 “queens” [1]. These changes help support the reproductive role of queens by differentiating them  
43 from nonbreeding colony members, who forage, care for young, and engage in colony defense  
44 [1, 2]. Queens are frequently much larger than their sterile colony mates (e.g., twice as large in  
45 honey bees and Pharaoh ants [3, 4]), reflecting dramatically altered growth and development  
46 programs that are explained by changes in gene regulation [5]. Social insects thus exemplify the

47 tight evolutionary links between reproductive division of labor, cooperative behavior, and  
48 extreme morphological plasticity.

49 Systems in which breeding is restricted to a single female supported by multiple  
50 nonbreeding helpers are also observed in vertebrates, including birds and mammals [6]. Here,  
51 breeding status is not determined during early development, but instead occurs in adulthood, and  
52 breeding is only achieved by those individuals who have the opportunity to transition into a  
53 reproductive role. In some species, new breeders undergo a period of accelerated growth, which  
54 may be important either for maintaining dominance or for supporting high fecundity [7-12].  
55 While substantial gene regulatory divergence with breeding status has been described for the  
56 brain and some peripheral organs [13-15], we know little about the gene regulatory shifts  
57 responsible for breeder-associated growth patterns. Because morphological change is often  
58 crucial for ramping up offspring production, these processes are key to understanding both the  
59 basis for, and limits of, status-driven differences in growth and development.

60 Here, we investigate the morphological and molecular consequences of experimental  
61 transitions to breeding status in female Damaraland mole-rats (*Fukomys damarensis*). Like naked  
62 mole-rats, Damaraland mole-rats are frequently classified as ‘eusocial’ [16-18], and female  
63 helpers who transition to queens experience accelerated vertebral growth associated with  
64 increases in fecundity [9, 11]. However, it is not clear what triggers skeletal remodeling, where it  
65 is localized within the vertebral column, or whether it extends to other parts of the skeleton.  
66 Further, the gene regulatory changes that support skeletal remodeling in mole-rat queens are not  
67 known, nor are their consequences for skeletal growth potential and integrity. To address these  
68 questions, we experimentally assigned age-matched, female littermates to become queens or  
69 remain as nonbreeders and evaluated gene regulatory and morphological changes induced by the  
70 transition to queen status. Our results indicate that, as in eusocial insects, females that acquire  
71 breeding status experience substantial morphological remodeling, associated with pathway-  
72 specific changes in gene regulation. Notably, we found that queens not only experience  
73 lengthening of their lumbar vertebrae, but also show reductions in the growth potential and  
74 structural integrity of their long bones. These changes result from increased rates of bone  
75 resorption that may increase the risk of fracture, indicating that the presence of helpers does not  
76 annul the costs of reproduction to queens.

77

## 78 **Results**

### 79 *Adaptive plasticity in the skeleton of Damaraland mole-rat queens*

80 Adult female Damaraland mole-rats were randomly assigned to either transition to queen  
81 status (n = 12) or remain as nonbreeders (n = 18) for the duration of the experiment (Figure 1A;  
82 Supplementary Table S1). Age at assignment (mean age = 19.4 ± 4.4 s.d. months) was consistent  
83 with the age at dispersal observed in wild Damaraland mole-rats (1 – 3 years, Thorley and  
84 Clutton-Brock, unpublished data). To resolve whether skeletal changes are a function of the  
85 queen transition *per se* versus release from reproductive suppression in the natal colony,  
86 nonbreeders were either kept in their natal colonies as helpers or placed into solitary housing in  
87 the absence of a breeding queen, recapitulating extended periods of dispersal in this species [18]  
88 (n = 10 helpers and n = 8 solitaires). At the time of assignment, females assigned to the queen,  
89 helper, and solitaire treatments were statistically indistinguishable in body mass, age, or vertebral  
90 length (as measured by lumbar vertebra 5 (LV5); unpaired t-tests between all pairwise  
91 combinations of treatments: p > 0.05; Supplementary Figure S1). When possible, we assigned  
92 age-matched littermates to queen versus nonbreeding treatments (26 of 30 experimental animals

93 were in sets of littermate sisters; Supplementary Table S1). Six non-experimental animals (1  
 94 queen and 5 nonbreeders) were also included in the sample, resulting in a total sample size of 13  
 95 breeders and 23 nonbreeders (Supplementary Table S1).

96 Females assigned to the queen treatment were each transferred to a new tunnel system  
 97 containing only an unrelated adult male, simulating the natural process of dispersal and new  
 98 colony formation in the wild [18]. This pairing procedure, which defines the queen treatment,  
 99 typically leads to immediate sexual activity and rapid activation of the reproductive axis,  
 100 including initiation of ovulation and the potential for conception [19, 20]. Queens gave birth to a  
 101 mean of  $6.92 \pm 5.57$  s.d. live offspring during the 12 – 22 month follow up period, produced in a  
 102 mean of  $2.85 \pm 1.75$  s.d. litters (range: 0 – 6; Supplementary Table S1). As expected, helpers and  
 103 solitaires produced no offspring, and did not differ from each other in body mass or vertebral  
 104 length after the 12 – 22 month follow-up period (unpaired t-tests, all  $p > 0.05$ ; Supplementary  
 105 Figure S2). Because helpers and solitaires were morphologically indistinguishable, and also  
 106 exhibited no differences in gene expression in our subsequent genomic assays (Supplementary  
 107 Table S2), we grouped them together into a single “nonbreeder” treatment for the remainder of  
 108 our analyses.

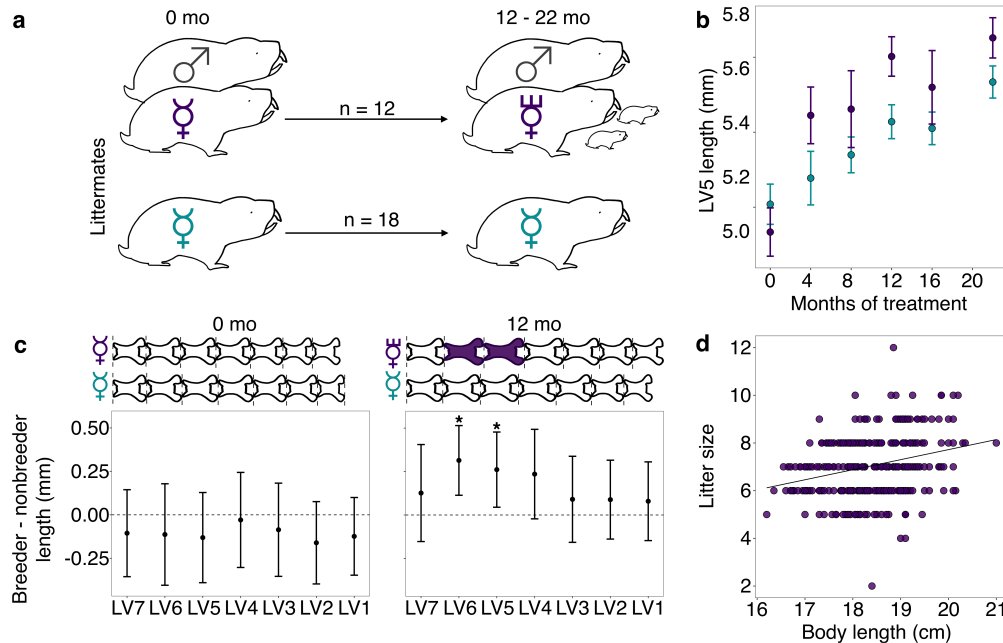

109 **Figure 1. Transition to queen status leads to lumbar vertebral lengthening.** (a) Experimental design:  
 110 nonbreeding adult female (♀) littermates were randomly assigned to transition to queen status (purple ♀) by being  
 111 paired with an unrelated male (♂), or to remain in a nonbreeding treatment (cyan). Duration of treatment ranged  
 112 from 12 – 22 months. (b) Queens show more rapid growth in lumbar vertebra 5 (LV5) in the first four months of the  
 113 experiment, relative to nonbreeders (treatment by time point interaction:  $\beta = 0.078$ ,  $n = 49$ ,  $p = 3.47 \times 10^{-3}$ ). Dots  
 114 show means  $\pm$  standard errors (bars). (c) At the start of the experiment (0 months, left panel), the lumbar vertebrae  
 115 of breeders do not differ from those of nonbreeders (unpaired t-tests, all  $p > 0.05$ ). However, at 12 months (right  
 116 panel), queens have longer lumbar vertebrae relative to nonbreeders (unpaired t-tests, \* indicates  $p < 0.05$ ). Dots  
 117 show means  $\pm$  standard errors (bars). Lengths of lumbar vertebrae above the plots are scaled to indicate the mean  
 118 lengths of queens (top) and nonbreeders (bottom) at each time point; vertebrae highlighted in purple are significantly  
 119 longer in queens relative to nonbreeders. (d) Litter size is positively correlated with maternal body length in the  
 120 Damaraland mole-rat colony ( $\beta = 0.353$ ,  $n = 328$  litters,  $p = 1.35 \times 10^{-3}$ ).

122 Compared to nonbreeders, queens showed rapid growth in the lumbar vertebrae in the  
 123 first 12 months post-pairing (Figure 1B), especially in the vertebrae toward the caudal end of the

124 vertebral column (LV5 and LV6). Based on longitudinal measurements, most of this differential  
125 growth was concentrated soon after the breeding status transition. Specifically, we observed a  
126 significant interaction between breeding status (queen versus nonbreeder) and post-pairing time  
127 point in the first four months of the experiment (Figure 1B;  $\beta = 0.0784$ ,  $p = 3.47 \times 10^{-3}$ ;  $n = 49$  x-  
128 rays from 28 animals), but not for measurements taken in later time point intervals (4 months  
129 versus 8 months; 8 versus 12 months, all  $p > 0.05$ ). Moreover, in the first four months, only  
130 queens that had already experienced pregnancy showed accelerated vertebral lengthening relative  
131 to nonbreeders (unpaired t-test; LV5 of pregnant queens vs. nonbreeders:  $t = -5.735$ ,  $df = 16.871$ ,  
132  $p = 2.50 \times 10^{-5}$ ; LV5 of queens not yet pregnant vs. nonbreeders:  $t = -0.789$ ,  $df = 13.007$ ,  $p =$   
133  $0.444$ ;  $n = 14$  nonbreeders, 5 pregnant queens, and 2 queens not yet pregnant).

134 As a result of accelerated vertebral growth in queens post-transition, size differences  
135 persisted throughout the study. After 12 months, the absolute length of LV5 in queens was, on  
136 average, 4.8% longer than nonbreeders (Figure 1C; LV5: unpaired t-test,  $t = 2.509$ ,  $df = 21.095$ ,  
137  $p = 0.020$ ), and the absolute length of the lumbar vertebral column in queens relative to  
138 nonbreeders was 3.5% longer, although the latter difference was not significant (unpaired t-test,  $t$   
139  $= 1.945$ ,  $df = 22.49$ ,  $p = 0.064$ ). Differences between queens and nonbreeders were even more  
140 apparent if lumbar vertebrae measures were scaled by zygomatic arch (head) width, as in  
141 previous studies [9, 11, 21] (LV5: 9.3% longer, unpaired t-test,  $t = 4.12$ ,  $df = 15.135$ ,  $p = 8.87 \times$   
142  $10^{-4}$ ; lumbar vertebral column length: 7.9% longer, unpaired t-test,  $t = 4.34$ ,  $df = 15.37$ ,  $p = 5.58$   
143  $\times 10^{-4}$ ). Thus, transitions to queen status induce reproductive investment, which in turn leads to  
144 organism-wide allometric changes that generate an elongated phenotype.

145 The elongated phenotype appears to subsequently facilitate future fecundity. Queens with  
146 longer bodies (which correlates with longer lumbar vertebrae, Pearson's  $r = 0.856$ ,  $p = 5.99 \times 10^{-59}$ ;  
147 Supplementary Figure S3) had more pups per litter (Figure 1D;  $\beta = 0.353$ ,  $p = 1.35 \times 10^{-3}$ ,  $n =$   
148 328 litters from all breeding groups maintained in the same breeding facility; Supplementary  
149 Table S3). Controlling for litter size, longer queens also had larger pups: for every additional  
150 centimeter of maternal body length, pup body mass increased by 2.9% ( $\beta = 0.28$ ,  $p = 0.032$ ,  $n =$   
151 971 pups). Thus, the elongated queen phenotype is a strong candidate for adaptive plasticity that  
152 supports increased fertility in queen mole-rats.

153

### 154 ***Breeding status induces gene regulatory changes in the queen mole-rat skeleton***

155 To identify the gene regulatory changes associated with skeletal plasticity, we cultured  
156 cells enriched for bone marrow-derived mesenchymal stromal cells (bMSCs) isolated from the  
157 lumbar vertebrae (pooled LV1 – LV5) of queens and nonbreeders ( $n = 5$  queens, 11  
158 nonbreeders). bMSC cultures include multipotent skeletal stem cells, the precursor of the  
159 osteoblast and chondrocyte lineages responsible for bone growth. In parallel, we cultured cells  
160 enriched for bMSCs from the pooled long bones (humerus, ulna, radius, left femur, and left tibia)  
161 of the same animals, which do not show increased elongation in queens (femur at 12 months:  
162 unpaired t-test,  $t = -0.202$ ,  $df = 19.326$ ,  $p = 0.842$ ; tibia at 12 months: unpaired t-test,  $t = -0.860$ ,  
163  $df = 16.759$ ,  $p = 0.402$ ). To evaluate the potential role of sex steroid hormone signaling on bone  
164 growth, we treated cells from each bone sample for 24 hours with either 10 nM estradiol or  
165 vehicle control, resulting in 47 total samples. We then performed RNA-seq on each sample to  
166 screen for genes that were systematically differentially expressed in the bone cells of queens  
167 versus nonbreeders.

168 Of 10,817 detectably expressed genes, 171 genes showed a significant effect of breeding  
169 status at a false discovery rate (FDR) threshold of 10% in the long bones (329 at an FDR of 20%;

170 Supplementary Table S4). Surprisingly, no genes showed a significant effect of breeding status  
171 in the lumbar vertebrae at either FDR threshold. However, effect sizes were highly correlated  
172 between bone types overall ( $R^2 = 0.75$ ,  $p = 4.60 \times 10^{-53}$ ), with more pronounced effects of  
173 breeding status in the long bone samples than in the lumbar vertebrae (paired t-test on breeding  
174 status effects in long bone versus vertebrae:  $t = 3.97$ ,  $df = 317.67$ ,  $p = 8.73 \times 10^{-5}$ ). Importantly,  
175 breeding status-related differences were not readily attributable to differences in bone cell  
176 composition. Based on both canonical markers of bMSC lineage cells and deconvolution of the  
177 RNA-seq data using data from 27 mesenchymal or hematopoietic lineage mouse cell types, the  
178 majority cell type in both queen and nonbreeder samples was most similar to cells from the  
179 bMSC lineage [22-24] (Supplementary Figures S4 and S5). Additionally, the top three principal  
180 components summarizing estimated cell type proportions did not differ between queens and  
181 nonbreeders (all FDR > 10%, Supplementary Table S5), and we identified no cases in which the  
182 effects of breeding status on gene expression were significantly mediated by the first principal  
183 component of cell composition ( $p > 0.05$  for all 171 queen-associated genes at 10% FDR;  
184 Supplementary Table S6).

185 The majority of breeding status-associated genes were up-regulated in queens (151 of 171  
186 genes, 88%). In support of their role in skeletal plasticity, up-regulated genes were enriched for  
187 bone remodeling ( $\log_2[\text{OR}] = 4.07$ ,  $p = 5.07 \times 10^{-6}$ ), a process that involves the balanced cycle  
188 between bone formation by osteoblasts and bone resorption by osteoclasts [25] (Figure 2).  
189 Surprisingly, however, enriched pathways were specifically related to bone resorption, not  
190 formation (Supplementary Table S7), including “positive regulation of bone resorption” (Figure  
191 2A, C;  $\log_2[\text{OR}] = 6.51$ ,  $p = 1.55 \times 10^{-6}$ ) and “superoxide anion generation,” which is involved in  
192 osteoclast activity and degradation of bone matrix (Figure 2A, C;  $\log_2[\text{OR}] = 5.29$ ,  $p = 1.4 \times 10^{-5}$ )  
193 [26-29]. Differentially expressed genes were also enriched for immune-related processes (e.g.,  
194 “cytokine secretion”, “chemotaxis”, “leukocyte activation involved in immune response”;  
195 Supplementary Table S7). These observations suggest that transitions to queen status also  
196 involve changes in immunoregulatory signaling (osteoclast cells are derived from monocytes).

197 Omni-ATAC-seq profiling of open chromatin regions further supports a central role for  
198 bone resorption and osteoclast activity in the queen skeleton ( $n = 8$ ; Supplementary Table S8).  
199 Specifically, transcription factor binding motifs (TFBMs) located in accessible chromatin near  
200 queen up-regulated genes were enriched for PU.1 and MITF, two transcription factors that are  
201 essential for osteoclast differentiation [30] (Figure 2B, C; PU.1  $\log_2[\text{OR}] = 1.041$ ,  $p = 2.84 \times 10^{-4}$ ;  
202 MITF  $\log_2[\text{OR}] = 0.707$ ,  $p = 7.36 \times 10^{-3}$ ; see Supplementary Table S8 for complete list of  
203 enriched TFBMs). *MITF* was also among the 151 genes that were differentially expressed  
204 between queens and nonbreeders and up-regulated in both queen long bones and lumbar  
205 vertebrae. Surprisingly, given the role of sex steroid hormones in bone growth and elevated  
206 estradiol levels in queen versus helper Damaraland mole rats [31], we observed no significant  
207 effects of estradiol treatment on gene expression in either bone type (all FDR > 10%). Queen up-  
208 regulated genes were also not in closer proximity to androgen response elements (ARE) or  
209 estrogen response elements (ERE) than expected by chance (ARE  $\log_2[\text{OR}] = 0.207$ ,  $p = 0.627$ ;  
210 ERE  $\log_2[\text{OR}] = 0.196$ ,  $p = 0.652$ ). Consistent with this observation, transcription factor  
211 footprinting analysis showed no evidence of queen-associated differences in transcription factor  
212 activity of the androgen receptor, estrogen receptor 1 (ESR1), or estrogen receptor 2 (ESR2), in  
213 either the long bones or lumbar vertebrae (all paired t-tests:  $p > 0.05$ ; Supplementary Figure S6).  
214 Thus, our data point to the involvement of non-sex steroid-mediated signaling pathways in  
215 remodeling queen mole-rat bones, at least after one year post-transition.

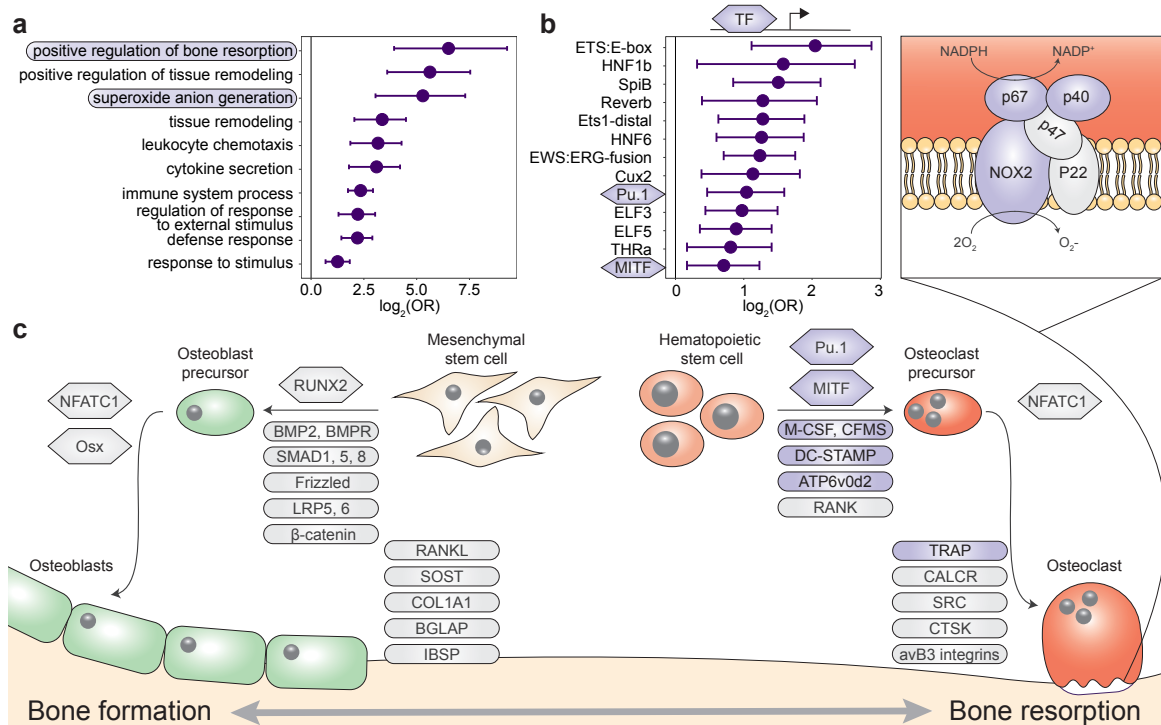

216 **Figure 2. Queen status drives increased regulatory activity of bone resorption pathways.** (a) Gene Ontology  
 217 (GO) terms enriched in queen up-regulated genes, relative to the background set of all genes tested. Bars represent  
 218 95% confidence intervals. Processes highlighted in purple are also depicted in (c). Highest-level (most general)  
 219 terms are shown; for full GO enrichment results, see Supplementary Table S7. (b) Accessible transcription factor  
 220 binding site motifs enriched near queen up-regulated genes, relative to all genes tested. Bars represent 95%  
 221 confidence intervals. Transcription factors highlighted in purple are also depicted in (c). (c) Schematic of the  
 222 balance between bone formation and bone resorption, showing key regulators and markers for mesenchymal stem  
 223 cell differentiation into osteoblasts and hematopoietic stem cell differentiation into osteoclasts [25, 30]. Note that not  
 224 all genes or proteins in gray were tested for differential expression (e.g., because they were not annotated in the  
 225 Damaraland mole-rat genome or were too lowly expressed in our sample); see Supplementary Table S4 for full set  
 226 of tested genes. Queen up-regulated genes or corresponding proteins (FDR < 10%) are highlighted as purple ovals,  
 227 and transcription factors with binding motifs enriched near queen up-regulated genes are highlighted as purple  
 228 hexagons. Inset for osteoclasts shows the NADPH oxidase system, which generates superoxide radicals ( $\text{O}_2^-$ )  
 229 necessary for bone resorption and is highly enriched for queen up-regulated genes (purple ovals).

230

### 231 *Extensive skeletal remodeling in queen mole-rats*

232 The gene expression data suggest that queen status-driven changes to the skeleton extend  
 233 beyond the lumbar vertebrae to the long bones. Further, they suggest that bone resorption—an  
 234 important counterpoint to bone formation that is required for normal skeletal maintenance—also  
 235 distinguishes breeding and nonbreeding females. To investigate this possibility, we performed  
 236 high-resolution micro-computed tomography ( $\mu\text{CT}$ ) scanning to generate 3D reconstructions of  
 237 LV6, LV7, right femur, and right tibia of queens and female nonbreeders ( $n = 140$  bones from 36  
 238 animals; Figure 3A; Supplementary Figure S7). This approach substantially increases the level of  
 239 resolution for investigating breeding status-linked differences in skeletal morphology, as  
 240 previous studies relied on x-ray data alone [9, 11].

241 We first asked whether breeding status could be predicted from morphological  
 242 differences in the 3D reconstructions. We found that it could for the lumbar vertebra, but not for  
 243 the femur: by applying the smooth Euler characteristic transform [32], we were able to predict

244 queen versus nonbreeder status in LV6 (77.8% accuracy,  $p = 0.01$ ,  $n = 36$ ), but not the femur  
245 (52.8% accuracy,  $p = 0.53$ ,  $n = 36$ ). Including only highly fecund queens ( $\geq 6$  total offspring)  
246 improved predictive accuracy in the femur (70% accuracy,  $p = 0.12$ ,  $n = 30$ ). Although these  
247 predictions did not reach statistical significance, they raised the possibility that morphological  
248 changes in femurs become enhanced with increasing reproductive effort.

249 We next tested whether the transition to queen status affects the ability to continue bone  
250 lengthening. Lengthening requires the presence of a growth plate, a region of cartilage in the  
251 bone where longitudinal growth occurs through proliferation of cartilage cells (chondrocytes)  
252 (Figure 3A, B; Supplementary Figure S7). Closure of the growth plate, which indicates that bone  
253 lengthening potential has terminated, typically occurs in mammals after reaching sexual  
254 maturation, when energy begins to be invested in reproduction instead of growth [33]. To test  
255 whether the transition to queen status alters bone lengthening potential, we performed Safranin-  
256 O staining on sections of the right tibia and LV7 to visualize growth plates (Figure 3B). In the  
257 proximal tibia but not LV7, queens were less likely to have open growth plates (Figure 3C;  
258 Supplementary Figure S7 and Table S9; tibia: two-sided binomial test,  $p = 0.019$ ; LV7: two-  
259 sided binomial test,  $p = 0.422$ ). The increased probability of growth plate closure in the tibia of  
260 queens is linked to the number of offspring a female has produced: females with more offspring  
261 showed a higher expanse of closure across the growth plate ( $\beta = 0.050$ ,  $p = 4.51 \times 10^{-3}$ ,  $n = 12$ ,  
262 controlling for age). This pattern may be due in part to reduced chondrocyte proliferation, as  
263 females that produced more offspring had fewer chondrocyte columns in the remaining growth  
264 plate (Figure 3D;  $\beta = -0.132$ ,  $p = 0.020$ ,  $n = 12$ , controlling for age). Thus, offspring production  
265 in queens is associated with loss of the ability to lengthen the long bones, but not the lumbar  
266 vertebrae, consistent with the importance of abdominal lengthening for supporting larger litters.

267 A major demand on reproductively active female mammals is a high requirement for  
268 calcium, particularly during lactation when mothers support rapid offspring bone growth.  
269 Maternal skeletons are remodeled to meet this demand, although in most mammals, these  
270 changes are not permanent (reviewed in [34]). Because of the particularly intense reproductive  
271 investment made by cooperatively breeding mole-rat queens, we therefore also evaluated the  
272 effect of queen status on trabecular and cortical bone volumes, which are thought to be important  
273 in satisfying short-term and long-term calcium demands, respectively. We found no effect of  
274 queen status on the amount of trabecular bone in the femur, tibia, LV6, or LV7 (all  $p > 0.05$  for  
275 bone volume/total volume). However, we found that cortical bone was significantly thinner at  
276 the femoral midshaft, but not in the lumbar vertebrae, in queens compared to their nonbreeding  
277 sisters (Figure 3E; Supplementary Figure S8; femur: paired t-test of cortical area/total area,  $t = -$   
278  $4.067$ ,  $df = 8$ ,  $p = 3.60 \times 10^{-3}$ ; LV6: paired t-test of cortical area/total area,  $t = -0.741$ ,  $df = 6$ ,  $p =$   
279  $0.487$ ). Cortical thinning in queens appears to be specifically due to increased bone resorption,  
280 which typically occurs on the endosteal (internal) surface of long bones in the marrow cavity.  
281 Indeed, queens had a larger marrow cavity (paired t-test,  $t = 5.355$ ,  $df = 8$ ,  $p = 6.82 \times 10^{-4}$ ; Figure  
282 3F) but showed no difference in periosteal area compared to their nonbreeding sisters (paired t-  
283 test,  $t = 1.539$ ,  $df = 8$ ,  $p = 0.162$ ; Figure 3G).

284

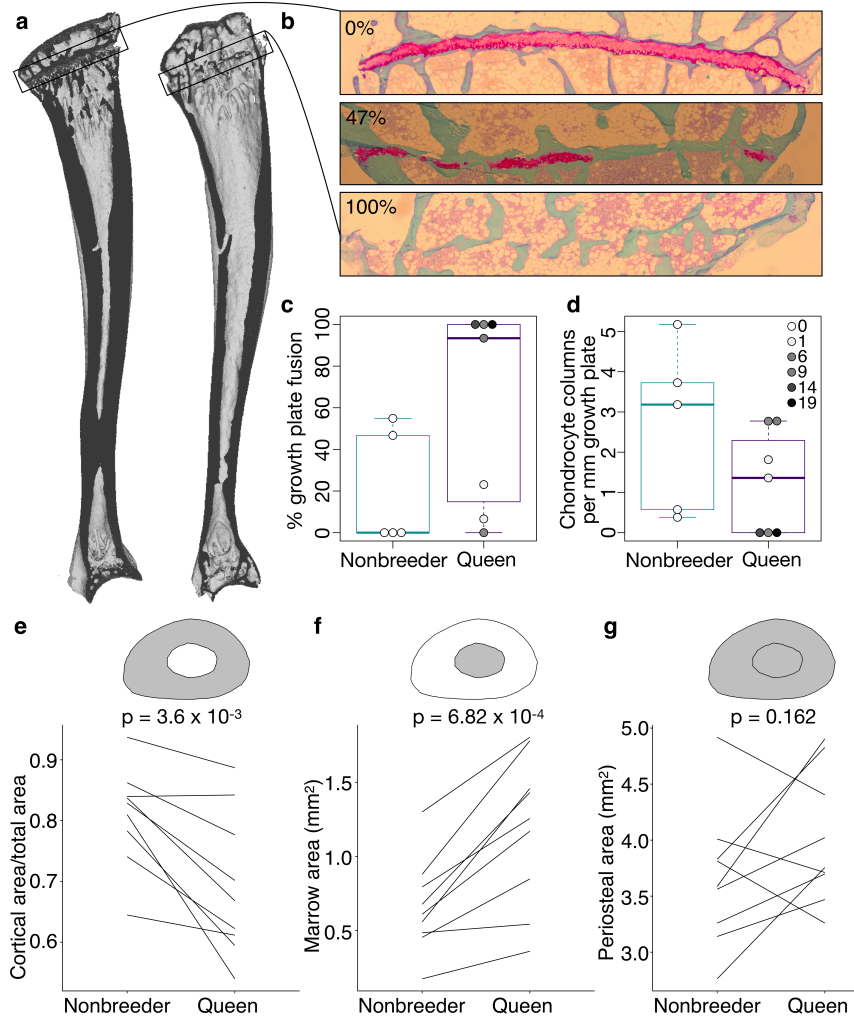

285 **Figure 3. Queen status leads to reduced growth potential in the tibia and reduced cortical area at the femoral**  
 286 **midshaft. (a)**  $\mu$ CT scans of Damaraland mole-rat tibias. Boxes indicate the location of the proximal growth plate,  
 287 which varies between unfused (left) to fully fused (right). **(b)** Example Safranin-O stained histological sections of  
 288 the proximal tibia, in which the growth plate is unfused (top), partially fused (middle), or fully fused (bottom).  
 289 Values indicate percent growth plate fusion across the width of the bone. The cartilaginous growth plate is stained  
 290 deep pink, and calcified bone is stained green. **(c)** Queens, and specifically queens that gave birth to more offspring,  
 291 show increased growth plate fusion ( $\beta = 0.050$ ,  $p = 4.51 \times 10^{-3}$ ,  $n = 12$ , controlling for age) and **(d)** decreased  
 292 number of chondrocyte columns within the remaining growth plate ( $\beta = -0.132$ ,  $p = 0.020$ ,  $n = 12$ , controlling for  
 293 age). Each box represents the interquartile range, with the median value depicted as a horizontal bar. Whiskers  
 294 extend to the most extreme values within 1.5x of the interquartile range. In (c) and (d), dots represent individual  
 295 animals, and shading indicates each animal's total offspring number. Ages of queens and nonbreeders do not  
 296 significantly differ (unpaired t-test,  $t = 0.489$ ,  $n = 12$ ,  $p = 0.644$ ). **(e-g)** Femoral cross-sections with area highlighted  
 297 in gray show the measures represented in the corresponding plots below. Each line represents an age-matched,  
 298 nonbreeder and queen littermate pair. **(e)** Queens have less cortical bone (relative to the total area of the femoral  
 299 midshaft cross-section), compared to their paired nonbreeding littermates (paired t-test,  $t = -4.07$ ,  $df = 8$ ,  $p = 3.60 \times$   
 300  $10^{-3}$ ). **(f)** Queens also have enlarged marrow cavities (paired t-test,  $t = 5.36$ ,  $df = 8$ ,  $p = 6.82 \times 10^{-4}$ ) but **(g)** show no  
 301 difference in overall periosteal area (paired t-test,  $t = 1.54$ ,  $df = 8$ ,  $p = 0.162$ ).  
 302

303 Because changes in cortical bone are thought to reflect accumulated demands over long  
 304 time frames, we hypothesized that cortical thinning in queens is a consequence of repeated  
 305 cycles of pregnancy and lactation over time, which can occur simultaneously in Damaraland  
 306 mole-rat queens. In support of this idea, we found that, within queens, the relative amount of



307 cortical bone is not predicted by the number of pups in a queen's most recent litter ( $\beta = -0.024$ ,  $n$   
 308  $= 13$ ,  $p = 0.287$ ), but instead by the total number of pups she produced in her lifetime.  
 309 Specifically, queens who had more live births had reduced cortical bone thickness along the  
 310 entire shaft of the femur (Figure 4 and Supplementary Table S10; across decile sections of the  
 311 femur: all  $p < 0.05$ , controlling for mother's litter as a random effect). Thus, cortical thinning  
 312 does not commence with the transition to queen status *per se* (i.e., it is not a correlate of  
 313 *achieving* breeder status), but instead appears to be a consequence of repeated investment in  
 314 pregnancy and lactation. Notably, thinning is particularly marked in queens who had at least six  
 315 offspring, which usually occurs by 14 months after a breeding status transition (i.e., by the third  
 316 litter; Supplementary Table S10). Given that wild Damaraland mole-rat queens can maintain  
 317 their status for many years [35], our results suggest that long-lived queens may experience  
 318 substantial morphological change.

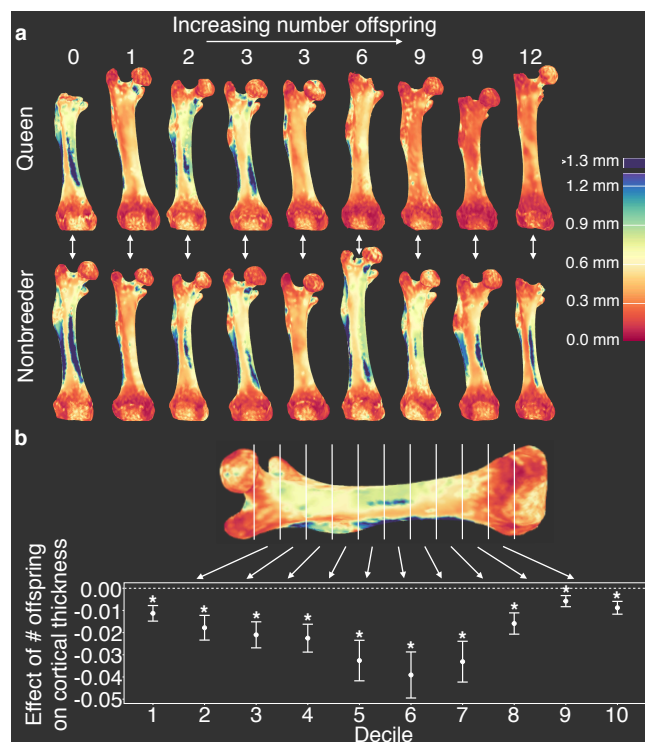

319 **Figure 4. Offspring production in queens leads to cortical thinning across the femoral shaft.** (a) Queens (top  
 320 row) relative to their same-aged female nonbreeding littermates (bottom row) present thinner cortical bone across  
 321 the femur, particularly in females that have many offspring (top right). Number of offspring is indicated above each  
 322 femur, and vertical arrows indicate littermate pairs. (b) Within each decile section across the femoral shaft, number  
 323 of offspring is negatively correlated with average cortical thickness (linear mixed model with littermate pair as  
 324 random effect). Full results are presented in Supplementary Table S10. Asterisk indicates  $p < 0.05$ .

325

### 326 ***Skeletal remodeling predicts increased risk of femur breakage in queens***

327 In humans, accelerated bone resorption is a central cause of osteoporosis-related bone  
 328 fragility [36]. We therefore hypothesized that cortical thinning in queen mole-rat femurs would  
 329 be linked to decreased bone strength. To test this hypothesis, we calculated two key indicators of  
 330 femoral structural integrity: cortical area (CA) and the minimum moment of inertia ( $I_{\min}$ , a  
 331 predictor of resistance to bending). In nonbreeders, both are positively correlated with body mass  
 332 ( $I_{\min}$ :  $R^2 = 0.368$ ,  $n = 24$ ,  $p = 9.92 \times 10^{-4}$ ; CA:  $R^2 = 0.407$ ,  $n = 24$ ,  $p = 4.80 \times 10^{-4}$ ). However, in  
 333 queens,  $I_{\min}$  is not significantly predicted by body mass ( $R^2 = 0.088$ ,  $n = 13$ ,  $p = 0.17$ ), but is

334 instead a function of number of offspring produced ( $R^2 = 0.283$ ,  $p = 0.035$ ). Queen CA is  
335 predicted by both offspring number and body mass, but offspring number explains almost twice  
336 the variance (offspring number  $R^2 = 0.634$ ,  $p = 6.83 \times 10^{-4}$ ; body mass  $R^2 = 0.385$ ,  $p = 0.014$ ).

337 To evaluate the effects of reproductive activity on the risk of bone failure, we drew on  
338 data on the relationship between CA and bone mechanical failure in a large data set of mouse  
339 femurs [37]. In this data set, CA is the best predictor of maximum load (the maximum force a  
340 bone can withstand prior to failure), and, crucially, the CA-max load relationship is highly linear  
341 (Supplementary Figure S9;  $R^2 = 0.88$ ,  $p = 6.64 \times 10^{-38}$ ). Scaling the mole-rat CA data to mouse  
342 suggests that transitions to queen significantly increase the risk of bone failure (Figure 5; hazard  
343 ratio (95% confidence interval) = 2.67 (1.20, 5.93),  $n = 36$ ,  $p = 0.016$ ). Similar to growth  
344 potential and cortical thinning, this effect is driven by highly fertile queens, such that those who  
345 had at least six offspring showed the highest predicted risk of bone failure (Figure 5; queens with  
346  $\geq 6$  offspring relative to nonbreeders: HR = 3.81 (1.47, 9.83),  $n = 30$ ,  $p = 0.006$ ). The risk of  
347 bone failure is thus predicted to increase by 21% for each additional pup (HR = 1.21 (1.10, 1.33),  
348  $n = 36$ ,  $p = 8.85 \times 10^{-5}$ ).

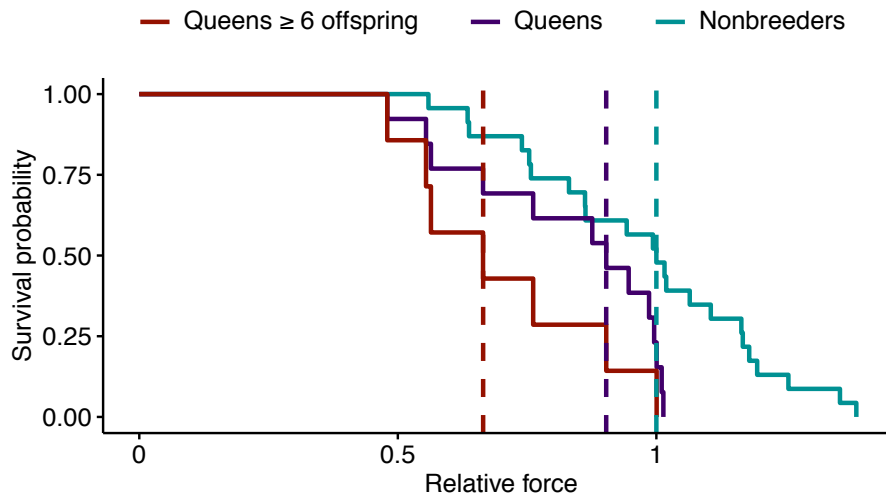

349 **Figure 5. Effect of reproductive status on the probability of bone failure.** Survival curves for femurs from nonbreeders versus  
350 queens (Wald test,  $p = 0.02$ ,  $n = 36$ ) and versus queens with  $\geq 6$  offspring (Wald test,  $p = 0.006$ ,  $n = 30$ ), based on predictions  
351 from the midshaft cortical area and data from [37]. Vertical dashed lines indicate group medians, with the median failure time for  
352 nonbreeders fixed at a value of 1.  
353

## 354 Discussion

355 Our results demonstrate that transitions to breeding status in Damaraland mole-rat queens  
356 lead to a cascade of skeletal changes linked to shifts in gene regulation. The vertebral  
357 lengthening observed in Damaraland mole-rat queens is concordant with previous reports of  
358 vertebral lengthening in both Damaraland mole-rats [11] and naked mole-rats [9]. Like naked  
359 mole-rats, our analyses show that most growth is concentrated soon after the breeding status  
360 transition, especially in connection with the first post-transition pregnancies [21, 38]. However,  
361 our findings also suggest subtle differences: for instance, while the growth phenotype in naked  
362 mole-rats occurs at the cranial end of the lumbar vertebrae [38], it is concentrated at the caudal  
363 end of the vertebral column in Damaraland mole-rats. Given that Damaraland mole-rats and  
364 naked mole-rats independently evolved a similar, highly cooperative social structure [18, 39],  
365 this difference suggests potential convergent evolution of the vertebral lengthening phenotype in  
366 queens, presumably in response to the selection pressure for increased fertility.

367 In addition to previously described vertebral growth, we found that queen Damaraland  
368 mole-rats lose bone lengthening potential in the long bones and develop thinner femurs that are  
369 predicted to be more prone to mechanical failure. Moreover, gene expression levels in queens  
370 reflect a signature of bone resorption, rather than bone growth, at the time of sampling, which  
371 occurred 1 – 2 years post-transition. The molecular signature of bone resorption temporally  
372 aligns with changes in morphology, in which accelerated vertebral growth primarily occurs  
373 during a female's first pregnancy, whereas cortical thinning in the long bones are a function of  
374 repeated cycles of offspring production. Thus, queens quickly progress from traits typically  
375 associated with pre-reproductive and pubertal growth in mammals (e.g., body elongation), to  
376 traits typically linked to aging (e.g., marrow cavity expansion and cortical thinning).

377 The complex pattern of bone growth and bone resorption in queens likely involves  
378 multiple regulatory mechanisms. Because estrogen is known to impact bone growth and  
379 maintenance [40, 41], and estrogen levels are higher in mole-rat queens relative to nonbreeding  
380 females [31], we hypothesized that queens and nonbreeders would differ in their response to  
381 estradiol in bone marrow-derived cells. Surprisingly, we observed no gene expression response  
382 to estradiol treatment. By itself, this result could be a function of the specific concentration or  
383 duration of estradiol treatment we applied. However, we also observed no enrichment for  
384 estrogen receptor binding motifs near queen up-regulated genes, and no evidence that estrogen or  
385 androgen receptor binding sites are differentially bound in cells from queens versus non-  
386 breeders. Thus, our results suggest a role for other, as-yet unknown signaling pathways in the  
387 queen-specific signature of long bone cortical resorption (although it does not exclude the  
388 importance of estrogen signaling in other phenotypes, such as bone elongation or growth plate  
389 closure, [42]).

390 Bone loss in Damaraland mole-rat queens may be an extreme of the typical mammalian  
391 pattern of bone remodeling, in which bone mineral density decreases during pregnancy and  
392 lactation, but recovers once offspring are weaned [34]. Thinning in mole-rats may be sustained,  
393 however, because queens begin gestating soon after lactating for the previous litter, leaving little  
394 to no time for recovery. One possible reason that this fast rate of breeding is achievable is that  
395 queens in colonies with more helpers work less and rest more [43], consistent with studies in  
396 other cooperative mammals that show that helpers alleviate breeding-associated loss of condition  
397 in queens [44]. Paradoxically, helpers might not only help offset costs of, but also contribute to,  
398 decreased bone mass in queens, given that large numbers of helpers are themselves produced via  
399 high queen fecundity, and reduced physical activity can also lead to decreases in bone mass [45].

400 The extent to which helpers reduce the costs of breeding to queens may also differ  
401 between species depending on the relative numbers of helpers to breeders. For example, in  
402 eusocial insects, large colonies and the high ratio of helpers to queens reduce the costs of  
403 reproduction to queens to very low levels [1, 2]. Similarly, in naked mole-rats (where colonies  
404 can include hundreds of animals, compared to dozens in Damaraland mole-rat colonies [17, 18,  
405 46]), a small sample of queens ( $n = 6$ ) suggests increased rather than decreased femoral cortical  
406 thickness relative to age-matched nonbreeders [47]. Testing how the costs and benefits of  
407 reproduction are resolved across different levels of cooperativity, including the molecular  
408 mechanisms that mediate these differences, is an important next step towards understanding the  
409 evolution of cooperative breeding in mammals.

410 Finally, despite frequent analogies between Damaraland mole-rats and eusocial insects  
411 [18, 46, 48], our results suggest some key points of differences. Specifically, while abdominal  
412 lengthening allows queen mole-rats to increase fecundity per reproductive effort, loss of cortical

413 bone in the femur is unlikely to directly benefit either fertility or survival. Instead, it reflects the  
414 cumulative burden of continuous cycles of pregnancy and lactation [34]. Thus, unlike eusocial  
415 insect queens [49, 50], Damaraland mole-rat queens incur morphological costs to concentrated  
416 reproduction in addition to morphological changes that facilitate increased fitness. How these  
417 costs translate into fertility or survival outcomes in natural populations remains a fascinating,  
418 unanswered question.

419

## 420 **Materials and Methods**

### 421 ***Study system and experimental design***

422 Damaraland mole-rats (*Fukomys damarensis*) were maintained in a captive colony at the  
423 Kuruman River Reserve in the Northern Cape Province of South Africa, within the species'  
424 natural range. Only animals born in captivity, with known birthdates and litter composition, were  
425 used in this study, so that exact ages were known. Animals were maintained in artificial tunnel  
426 systems built from PVC pipes with compartments for a nest-box and waste-box and transparent  
427 windows to allow behavioral observation [51]. Animals were fed *ad libitum* with sweet potatoes  
428 and cucumbers.

429 Adult females (> 1 year) from 16 natal colonies were randomly assigned to be either  
430 nonbreeders or queens, such that females assigned to queen status had age-matched littermates,  
431 where possible, who were assigned to the nonbreeding condition. To distinguish the effects of  
432 queen status from release from reproductive suppression, nonbreeders were either maintained in  
433 their natal colony as helpers or maintained alone, which models the social condition experienced  
434 by dispersing females. Females assigned to the breeder condition were transferred to a new  
435 tunnel system with an unrelated male from a separate social group. Nine new breeding females, 6  
436 helpers, and 8 solitary females (age-matched littermates where possible; Supplementary Table  
437 S1) were set up in December 2015 – July 2016 [11]. With one exception (animal G10F026),  
438 animals maintained their breeding status for 14 – 22 months before sample collection. One queen  
439 and five helpers that were siblings, but not age-matched littermates, of experimental animals  
440 were also included in sample collection. To increase the final sample size, an additional 4  
441 breeding colonies, matched against 4 age-matched littermate helpers, were formed in October  
442 2017 and followed for 11-12 months (Supplementary Table S1). One queen died before sample  
443 collection, and one non-experimental helper was euthanized during the course of the study and  
444 included in sample collection. The final sample size included 13 queens, 15 helpers, and 8  
445 solitary females.

446

### 447 ***X-ray data***

448 For a subset of study subjects, full body X-rays were taken using the Gierth TR 90/20  
449 battery-operated generator unit with portable Leonardo DR Mini plate (OR Technology,  
450 Rostock, Germany) every two months during the first 12 months of the experiment and at the  
451 time of sacrifice. From these X-rays, an experimenter blind to animal breeding status measured  
452 the length of each lumbar vertebra (from vertebra 1 to 7), the right femur, the right tibia, body  
453 length, and the width of the zygomatic arch using ImageJ [52]. The caudal-most lumbar vertebra  
454 was labeled as LV7. We tested for an effect of breeding status on LV5 using a linear mixed  
455 model in which post-pairing time point, breeding status, and the interaction of time point by  
456 breeding status were modeled as fixed effects and animal ID as a random effect.

457

### 458 ***Effects of queen body length on fertility***

459 To test the effect of maternal body length on litter size and pup size, we used body length  
460 measurements obtained during routine colony monitoring of all queens maintained in the captive  
461 colony (i.e., not restricted to experimental animals). Following [11], we used body length  
462 measurements obtained nearest to, and no more than 90 days from, the date of parturition. The  
463 resulting dataset included 328 litters (971 pups) from 76 mothers, which represents a 76%  
464 increase over an earlier analysis of this relationship in [11]. We fit two linear mixed effects  
465 models. In the first model, we modeled litter size as a function of maternal body length,  
466 controlling for whether the litter was the female's first litter, and included maternal ID as a  
467 random effect. In the second model, we modeled pup mass as a function of maternal body length,  
468 controlling for litter size and whether the litter was the female's first litter as fixed effects, and  
469 maternal ID and litter ID as random effects.

470

### 471 ***Sample collection and cell culture from lumbar vertebrae and long bones***

472 Animals were deeply anesthetized with isoflurane and sacrificed with decapitation  
473 following USGS National Wildlife Health Center guidelines and under approval from the  
474 Animal Ethics Committee of the University of Pretoria. Immediately upon sacrifice, the lumbar  
475 vertebrae and long bones were dissected, and attached muscle tissue was removed with forceps.  
476 Lumbar vertebrae 6 and 7 and the right femur and tibia were collected into 50% ethanol for 24  
477 hours, then transferred to 70% ethanol and stored at 4° C for  $\mu$ CT scans and histochemistry.

478 To isolate bone cells for culture, lumbar vertebrae 1 – 5 were incubated in 2%  
479 Collagenase P (Roche, Switzerland) for 30 minutes at 30° C. Each bone was then cut in half and  
480 transferred to a 1.5 ml microcentrifuge tube containing a G-Tube microcentrifuge tube (VWR,  
481 Radnor, PA, USA) that had been punctured at the bottom with a 15 gauge needle. Tubes were  
482 spun at 3,000 RCF for 5 seconds, allowing the marrow to collect into the 1.5 mL microcentrifuge  
483 tube. Cell pellets were resuspended in red blood cell lysis buffer, pooled, and incubated for 3  
484 minutes at room temperature. 10 ml bMSC media (MEM-alpha [ThermoFisher, Waltham, MA,  
485 USA] + 15% fetal bovine serum [Hyclone, Logan, UT, USA] + 1% penicillin/streptomycin + 2  
486 ng/ml recombinant human fibroblast growth factor-basic [Biocam, Centurion, Gauteng, South  
487 Africa] + 10 nM ROCK inhibitor Y-27632 [RI; Cayman Chemical, Ann Arbor, MI, USA]) was  
488 added to stop lysis, and the tubes were spun for 5 minutes at 300 RCF. The cell pellet was  
489 resuspended in 1 ml bMSC media and strained through a 70  $\mu$ m cell strainer. Cells were plated at  
490  $1.6 \times 10^5$  cells per  $\text{cm}^2$ . The long bones (excluding right femur and tibia) were processed to  
491 enrich for bMSCs following the same procedure, but without incubation in Collagenase P. Cells  
492 were cultured at 37° C and 5% CO<sub>2</sub>. Twenty-four hours post plating, plates were carefully  
493 washed three times with 1x PBS and supplied with fresh media to remove non-adherent cells.  
494 Once bMSC clusters were visible (2 – 9 days post plating), plates were fed bMSC media without  
495 RI or fed bMSC media without RI + 10 nM estradiol (E2). Twenty-four hours later, cells were  
496 collected into buffer RLT and stored at -80° C. Samples were shipped on dry ice to Duke  
497 University for RNA extraction using the Qiagen RNeasy Micro Kit. RNA-Seq libraries were  
498 generated using the NEBNext Single Cell/Low Input RNA Library Prep Kit for Illumina.

499

### 500 ***Gene expression analysis***

501 RNA-Seq libraries were sequenced on an Illumina HiSeq 4000 (100 base pair single end  
502 reads) to a mean coverage of  $16.1 \pm 3.9$  s.d. million reads. Reads were trimmed with *cutadapt*  
503 version 2.3 [53] (parameters: -q 20 -e 0.2 --times 5 --overlap 2 -a AGATCGGAAGAGC -a "T" -  
504 -minimum-length=20). Trimmed reads were then mapped to the Damaraland mole-rat v1.0

505 genome [54] (DMR\_v1.0) using two pass mapping with STAR [55]. Only uniquely mapped  
506 reads were retained. HTseq [56] was used to quantify read counts mapping to genes (using the  
507 v1.0.92 gtf file from Ensembl; we extended the genomic coordinates of the *SERPINE1* gene by  
508 2000 basepairs in both directions due to very high expression directly adjacent to the annotated  
509 coordinates). We transformed read counts to transcripts per million (TPM) [57], and retained  
510 only genes with  $\text{TPM} \geq 2$  in at least 25% of samples. We performed voom normalization [58] on  
511 the raw counts, using normalization factors produced by the trimmed mean of M-values (TMM)  
512 method [59] in DESeq [60]. We used the *limma* [61] function *lmFit* to regress out the proportion  
513 of uniquely mapped reads in genes (which controls for efficiency of mRNA selection during  
514 RNA-Seq library preparation) and animal natal colony (which controls for littermate sets and  
515 date of sacrifice) to obtain normalized, batch-corrected gene expression values for downstream  
516 analysis. We used the mixed effects model approach in *emmeans* [62] to estimate, for each gene,  
517 the effect of breeding status on gene expression within lumbar vertebrae and within long bones  
518 using the following model:  
519

$$y_i = \mu + d_i\beta_1 + b_i\beta_2 + q_i\beta_3 * I(b = 0) + q_i\beta_4 * I(b = 1) + s_i\beta_5 * I(b = 0) + s_i\beta_6 * I(b = 1) + Zu + \varepsilon_i,$$

$$u \sim MVN 0, \sigma_u^2 K,$$

$$\varepsilon \sim MVN 0, \sigma_e^2$$

521 where  $y$  is the vector of gene expression levels for  $n = 47$  samples (indexed by  $i$ );  $\mu$  is the  
522 intercept;  $d$  is the number of days in culture and  $\beta_1$  its effect size;  $b$  is bone type (i.e., long bones  
523 or lumbar vertebrae) and  $\beta_2$  its effect size; and  $q$  is a 0/1 variable representing breeder status and  
524  $\beta_3$  and  $\beta_4$  its effect size in long bones and lumbar vertebrae, respectively.  $I$  is an indicator  
525 variable for bone type (0 = long bone; 1 = lumbar vertebrae).  $s$  is a 0/1 variable representing  
526 whether the cells were cultured with estradiol and  $\beta_5$  and  $\beta_6$  are its effect sizes in long bones and  
527 lumbar vertebrae, respectively.  $Z$  is an incidence matrix that maps samples to animal ID to take  
528 into account repeated sampling from the same individual, and  $u$  is a random effect term that  
529 controls for relatedness.  $K$  is an  $m$  by  $m$  matrix of pairwise relatedness estimates (derived from  
530 the genotype data, described below) between all  $m$  animals.  $\varepsilon$  is the residual error,  $\sigma_u^2$  is the  
531 genetic variance component, and  $\sigma_e^2$  is the environmental variance component. We also ran an  
532 identical model but with an additional fixed effect of solitaire status in long bones and in lumbar  
533 vertebrae, to test for a difference in gene expression between helpers and solitaires. To control  
534 for multiple testing, we calculated the false discovery rate following Storey and Tibshirani [63]  
535 using an empirical null distribution derived from 100 permutations of each variable of interest.

537 We used g:profiler [64] to perform gene ontology enrichment analysis of the genes up-  
538 regulated with queen status in lumbar vertebrae and long bones (151 of 171 genes significantly  
539 associated with queen status at a 10% FDR). All genes in the original analysis set were used as  
540 the background gene set. We set both the minimum size of the functional category and the  
541 minimum size of the query/term intersection to 3. Finally, we retained categories that passed a  
542 Bonferroni corrected p-value of 0.05.

#### 543 **Genotyping to estimate relatedness**

545 To control for relatedness when modeling the gene expression data, we performed single  
546 nucleotide polymorphism (SNP) genotyping of the RNA-Seq data using the Genome Analysis  
547 Toolkit [65] (GATK). We used the SplitNCigarReads function on the trimmed, uniquely mapped

548 reads and performed GATK indel realignment. Base recalibration was performed by using all  
549 SNPs with  $GQ \geq 4$  in an initial UnifiedGenotyper run on the full data set as a reference.  
550 Genotypes were called on the recalibrated bam files using HaplotypeCaller. Variants were  
551 filtered with the following GATK VariantFiltration parameters:  $QUAL < 100.0$ ,  $QD < 2.0$ ,  $MQ <$   
552  $35$ ,  $FS > 30$ ,  $HaplotypeScore > 13$ ,  $MQRankSum < -12.5$ ,  $ReadPosRankSum < -8$ . Variants were  
553 further filtered with *vcftools* [66] to only retain biallelic SNPs in Hardy-Weinberg equilibrium ( $p$   
554  $> 0.05$ ) with minor allele frequency  $\geq 0.1$ , minimum mean depth of 5, max missing count of 2,  
555 and minimum GQ of 99. Finally, SNPs were thinned to a distance of 10 kb basepairs, resulting in  
556 a final dataset of 1,965 stringently filtered biallelic SNPs. Missing values were imputed using  
557 *beagle* [67], and the resulting vcf file was used to create a kinship matrix using *vcftools* [66].  
558 Values of the kinship matrix were confirmed to be higher in known siblings compared to non-  
559 siblings (unpaired t-test,  $t = 27.939$ ,  $p = 2.23 \times 10^{-12}$ ; means = 0.513 and -0.097). Two pairs of  
560 siblings were found to have different fathers (G1F022 and G1F025; G4F020 and G4F019).

561

### 562 ***Cell type heterogeneity***

563 Although selection for adherent cells from bone marrow enriches for bMSCs, other cell  
564 types are also present [68]. To assess whether cell type heterogeneity accounts for queen-  
565 associated differential expression, we used CIBERSORT to deconvolve the proportion of  
566 component cell types from the RNA-Seq data [24]. We trained CIBERSORT on a data set of  
567 quantile normalized gene expression values from mouse purified primary cell populations [23].  
568 Specifically, we subset the training data to 27 purified cell populations of mesenchymal or  
569 hematopoietic origin (Figure S3) and to genes that were included in our mole-rat gene expression  
570 dataset. We then predicted the composition of the cells that contributed to the mole-rat quantile  
571 normalized gene expression data set, for each sample.

572 To test whether cell type heterogeneity was significantly explained by queen status, we  
573 also modeled cell type proportion (as summarized by the first principal component of  
574 CIBERSORT-estimated proportions for all 27 potential cell types; PC1 explains 50.9% of the  
575 overall variation) following the same method used for gene-by-gene expression analysis but with  
576 PC1 included as an explanatory variable. We then performed mediation analysis on each of the  
577 171 genes that showed a significant effect of breeding status at  $FDR < 10\%$ . To do so, we first  
578 estimated the indirect effect of breeding status on gene expression through the mediating variable  
579 (CIBERSORT PC1). The indirect effect of breeding status through CIBERSORT PC1 was  
580 estimated by calculating the difference in the effect of breeding status between two models: one  
581 model that did not include the mediator (i.e.,  $\beta_3$  and  $\beta_4$  from equation 1 above) and the same  
582 model with the addition of the mediating variable. We performed 1000 iterations of bootstrap  
583 resampling to obtain the 95% confidence interval for the indirect effect, and considered an  
584 indirect effect for a gene significant if the 95% interval did not overlap 0.

585

### 586 ***ATAC-seq data and transcription factor binding site analysis***

587 To investigate whether differentially expressed genes were associated with accessible  
588 binding motifs for specific transcription factors, we generated Omni-ATAC-seq data to profile  
589 regions of open chromatin [69, 70]. We performed Omni-ATAC-seq on both lumbar vertebrae  
590 bMSCs and long bone bMSCs from two female nonbreeding and two queen mole-rats ( $n = 8$   
591 libraries total), following the published protocol [70] with the following modifications: 5,000  
592 cells were centrifuged at 500 RCF for 5 minutes at 4°C. The pellet was resuspended in 50 ul  
593 transposition mix (25 ul 2xTD buffer, 16.5 ul PBS, 6.75 ul water, 1 ul 10% NP40, 1 ul 10%

594 Tween-20, 1 ul 1% digitonin, and 0.25 ul Tn5 transposase). The reaction was incubated at 37°C  
595 for 30 minutes without mixing, followed by a 1.5x Ampure bead cleanup. Omni-ATAC libraries  
596 were sequenced on a NovaSeq 6000 as 100 basepair paired-end reads to a mean coverage ( $\pm$  SD)  
597 of 26.9 ( $\pm$ 4.4) million reads (range: 16.8 – 38.3). Reads were trimmed with Trim Galore! [71] to  
598 remove adapter sequence and low quality basepairs (Phred score < 20; reads  $\geq$  25 bp). Read pairs  
599 were mapped to the DMR\_v1.0 genome using *bwa-mem* [72] with default settings. Only  
600 uniquely mapped reads were retained. The alignment bam files for each treatment (breeding or  
601 nonbreeding) were merged, and open chromatin regions were identified using MACS2 v2.1.2  
602 [73] with the following parameters: “-nomodel -keep-dup all -q 0.05”. We combined open  
603 chromatin peaks with regions in the DMRv1.0 genome that match sequences of vertebrate  
604 transcription factor binding site motifs, using motifs defined in the HOMER database [74]. We  
605 used Fisher’s exact tests (using a p-value threshold of 0.01) to test if transcription factor binding  
606 motifs belonging to the same transcription factor were enriched in open chromatin regions within  
607 2,000 bp of the 5’ most transcription start site of queen up-regulated genes.

608 To compare genome-wide signatures of DNA-transcription factor binding for androgen  
609 receptor (AR), estrogen receptor 1 (ESR1), and estrogen receptor 2 (ESR2), we characterized  
610 transcription factor footprints in queens and nonbreeders, in both the lumbar vertebra and long  
611 bones, using HINT-ATAC from the Regulatory Genomics Toolbox (RGT) with default  
612 parameters [75]. We focused on the subset of peak regions called using MACS2 [73]. We  
613 identified TF footprints by merging reads within each bone type-breeding status combination and  
614 calling footprints on the combined data. For each bone type, we then created a meta-footprint set  
615 by merging the respective footprint calls across queens and nonbreeders using the *bedtools*  
616 function *merge* [76]. We identified transcription factor motifs in the *DMR\_v1.0* genome that fell  
617 within meta-footprints, based on the JASPAR CORE Vertebrates set of curated position  
618 frequency matrices [77]. Finally, we tested for differential footprints of AR, ESR1, and ESR2  
619 binding using the RGT *differential* function, using the activity score metric described in [75] and  
620 default parameters.

621

### 622 ***Micro-CT scans and analysis***

623 We performed  $\mu$ CT scans of LV6, LV7, right femur, and right tibia using a VivaCT 80  
624 scanner (Scanco Medical AG, Brüttisellen, Switzerland) set at 55 kVp and 145  $\mu$ A, with voxel  
625 size 10.4  $\mu$ m. Trabecular bone was quantified from the 100  $\mu$ CT slices below the proximal tibia  
626 growth plate, the 100  $\mu$ CT slices above the distal femur growth plate, and the 100  $\mu$ CT slices  
627 medial to the caudal growth plate of LV6. To obtain midshaft cross-sections of the femur, tibia,  
628 and LV6, we first reduced each bone mesh to 100,000 faces using Avizo Lite version 9.7.0.  
629 Mesh files from the same bone type were auto-aligned using Auto3dgm [78] in Matlab. Aligned  
630 mesh files were then back scaled to their original sizes in Matlab, and the midshaft cross-section  
631 was generated using Rhinoceros version 6. The MomentMacro plugin in ImageJ was used to  
632 calculate bone area and moment of inertia.

633

### 634 ***Classification of breeding status from bone shape***

635 To predict breeding status from bone shape, we first applied the smooth Euler  
636 characteristic transform [32] to the aligned right femur and LV6. We then performed leave-one-  
637 out predictions, running each bone type separately, using the linear kernel and c-classification  
638 with the support vector machine (SVM) implemented by the R package *e1071* [79]. The SVM  
639 classifier was equipped with 1:100,000 weighting to achieve class balanced predictions. The



640 empirical p-values were estimated for each bone type by running 100 permutations of the  
641 queen/nonbreeder labels [80].

642

### 643 ***Histochemistry***

644 For a subset of individuals (Supplementary Table S9), the tibia and LV7 were plasticized,  
645 sectioned, and stained with Safranin O by the Washington University Musculoskeletal Research  
646 Center. The proportion of the tibia proximal growth plate that was fused, and the mean  
647 proportion of the LV7 cranial and caudal growth plates that were fused, were measured in  
648 ImageJ from Safranin O stained sections. To quantify growth plate activity, we calculated the  
649 number of chondrocyte columns (defined as linear stacks of at least three chondrocytes)  
650 controlling for length of open growth plate. For each bone type (tibia and LV7), we ran two  
651 models: proportion growth plate fusion or chondrocyte columns per mm growth plate as the  
652 dependent variable, and number offspring born and age as the independent variables.

653

### 654 ***Cortical thickness across the femur***

655 We used Stradview [81, 82] on dicom images from the  $\mu$ CT scans to measure and  
656 visualize, in an automated manner, cortical thickness across the surface of the femur. Bone  
657 surface was defined in Stradview by thresholding pixel intensity and contouring the bone at  
658 every 14 sections, with the following parameters: resolution = medium, smoothing = standard,  
659 strength = very low, contour accuracy = 6. To measure cortical thickness, we used the auto  
660 threshold method in Stradview, with line width set to 5, smooth set to 1, and line length set to 3  
661 mm. The smoothed thickness values of each femur were then registered (i.e., mapped) to a single  
662 “canonical” femur surface (mole-rat GRF002) using wxRegSurf v18  
663 (<http://mi.eng.cam.ac.uk/~ahg/wxRegSurf/>). We sectioned the cortical thickness values into  
664 deciles according to location along the length of the femur. The top and bottom deciles were  
665 removed, because cortical and trabecular bone towards the ends of the femur could not be easily  
666 differentiated by the automated method. Deciles were then recreated for the remaining length of  
667 the bone (i.e., the central 80%). From each bone decile, we estimated cortical thickness as the  
668 mean of all cortical thickness measures within that interval. For each decile across animals, we  
669 used a linear mixed model to model cortical thickness as a function of breeding status and  
670 number offspring, with litter pair as a random effect.

671

### 672 ***Modeling the probability of bone failure***

673 Previous research on mechanical properties of rodent femurs found that, among several  
674 morphological and compositional traits measured in eight morphologically varying mouse  
675 strains, cortical area (CA) at the midshaft was the best predictor of maximum load (defined as  
676 the greatest force attained prior to bone failure, measured via four-point bending; published  
677 Pearson’s  $r = 0.95$ ) [37]. We therefore used cortical area at the femoral midshaft to predict max  
678 load of Damaraland mole-rat femurs. To do so, we first fit a linear model of max load as a  
679 function of cortical area (unadjusted for body weight) using published mouse data ( $R^2 = 0.877$ ,  $n$   
680  $= 81$ ,  $p = 6.64 \times 10^{-38}$ ) [37]. We extrapolated from this linear fit to predict max load from cortical  
681 area at the midshaft of Damaraland mole-rat femurs. Predicted max loads were then used as input  
682 for Cox proportional hazards models, comparing either all queens to nonbreeders or queens with  
683  $\geq 6$  offspring to nonbreeders. Models were fit using the R function *coxph*, and were confirmed to  
684 meet the proportional hazards assumption using the *cox.zph* function in the R package *survival*  
685 [83]. Because max load was not directly measured in the Damaraland mole-rats, we used the Cox

686 proportional hazards models to specifically evaluate the relative hazard of bone failure  
687 depending on queen status/number of offspring. We therefore report the results in Figure 5 based  
688 on relative force (with the median predicted failure value for nonbreeders set to 1) instead of  
689 absolute force in Newtons.

690

#### 691 **Data Availability**

692 All RNA sequencing data generated during this study are available in the NCBI Gene Expression  
693 Omnibus (series accession GSE152659). ATAC-Seq data are available in the NCBI Sequence  
694 Read Archive (BioProject accession number PRJNA649596).  $\mu$ CT data from this study are  
695 available on MorphoSource (<http://www.morphosource.org>, project 1056).

696

#### 697 **Acknowledgements**

698 We thank Tim Vink, Dave Gaynor, and the mole-rat house staff and volunteers for their  
699 tremendous contributions to the Kalahari Mole-rat Project. We also thank Irene Garcia, Mari  
700 Cobb, Brianna Bowman, Anna Luiza Wolf, Alice Zhou, Yilin Yu, B.J. Nielsen, and Tawni  
701 Voyles for their contributions to sample collection and data generation, Graham Treece for  
702 guidance on quantifying bone thickness with Stradview, Karl Jepsen for sharing data on mouse  
703 femurs, Lou DeFrate for guidance on estimating bone strength, Saideep Gona and Luis Barreiro  
704 for their contributions on the footprint analysis, and members of the Tung lab for feedback on  
705 earlier versions of this manuscript. Support for this work was provided by the European  
706 Research Council (Grants 294494 and 742808 to T.C.B), the Human Frontier Science Program  
707 (RGP0051-2017 to J.T., S.M., and T.C.B.), the National Science Foundation (IOS-7801004 to  
708 J.T.), the National Institutes of Health (F32HD095616 to R.A.J.), a Sloan Foundation Early  
709 Career Research Fellowship to J.T., a Foerster-Bernstein Postdoctoral Fellowship to R.A.J., and  
710 a Natural Environmental Research Council Doctoral Training Program to Ja.T. High-  
711 performance computing resources were supported by the North Carolina Biotechnology Center  
712 (Grant Number 2016-IDG-1013).

713

#### 714 **Author Contributions**

715 Conceptualization, R.A.J., T.C.B., and J.T.; Investigation, R.A.J., Ja.T., P.V., H.K., L.S., S.M.,  
716 C.K., T.C.B., and J.T. Formal Analysis, R.A.J., H.K., S.M.; Writing—Original Draft, R.A.J. and  
717 J.T.; Writing—Reviewing & Editing, R.A.J., P.V., Ja.T., H.K., L.S., S.M., C.K., T.C.B., and J.T.  
718 Funding Acquisition, J.T. and T.C.B. Supervision, T.C.B. and J.T.

719

#### 720 **Competing Interests**

721 The authors declare no competing interests.

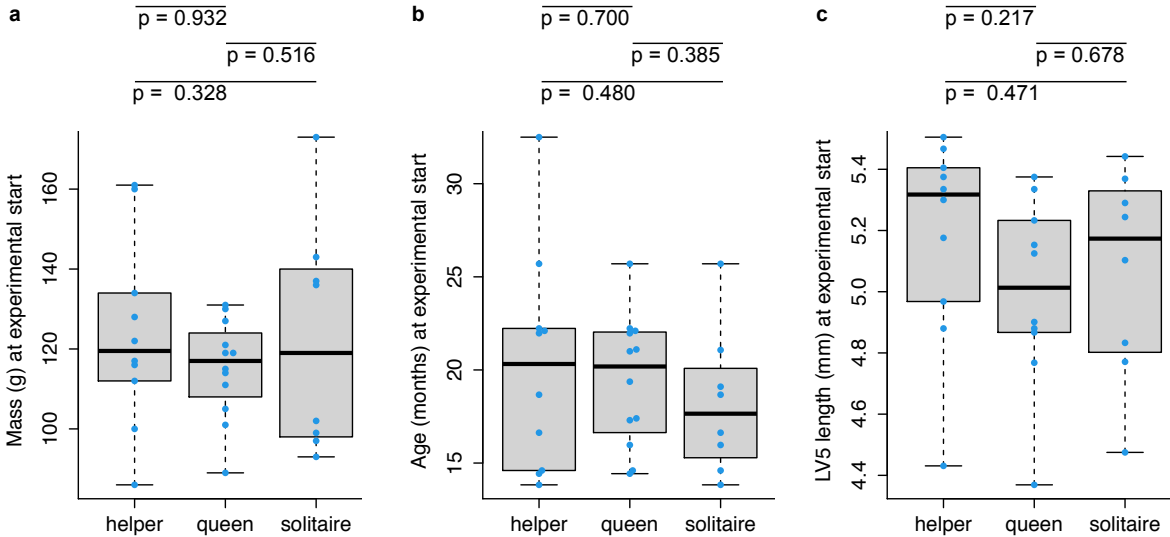

722 **Supplementary Figure S1. Queen, helper, and solitaire female mole-rats do not differ in**  
723 **mass, age, or lumbar vertebra 5 length at the start of the experiment.** Each box represents  
724 the interquartile range, with the median value depicted as a horizontal bar. Whiskers extend to  
725 the most extreme values within 1.5x of the interquartile range. Dots represent individual animals.  
726 P-values are from unpaired t-tests between each pairwise comparison between helpers (n = 10),  
727 queens (n = 12), and solitaires (n = 8). For LV5 length, data were only available for 10 queens.  
728 Raw data values are provided in Supplementary Table S1.

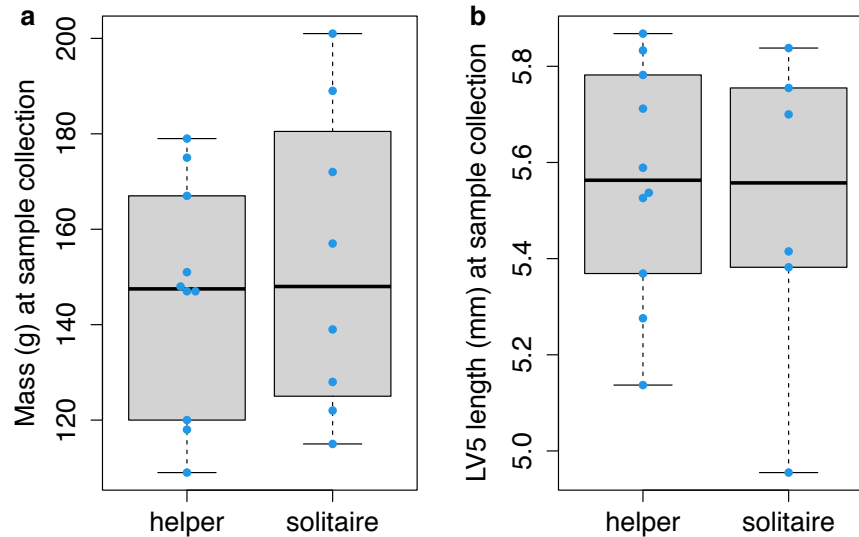

729 **Supplementary Figure S2. Mass and LV5 length of helper and solitaire female mole-rats**  
730 **after 12 – 22 months of experimental treatment of social status.** Helper and solitaire female  
731 mole-rats do not differ in (a) mass (unpaired t-test;  $t = 0.496$ ,  $df = 12.733$ ,  $p = 0.629$ ) or (b)  
732 lumbar vertebra 5 length (unpaired t-test;  $t = -0.358$ ,  $df = 8.391$ ,  $p = 0.729$ ) after 12 – 22 months  
733 of experimental treatment of social status. Each box represents the interquartile range, with the  
734 median value depicted as a horizontal bar. Whiskers extend to the most extreme values within  
735 1.5x of the interquartile range. Dots represent individual animals. Raw data values are provided  
736 in Supplementary Table S1.

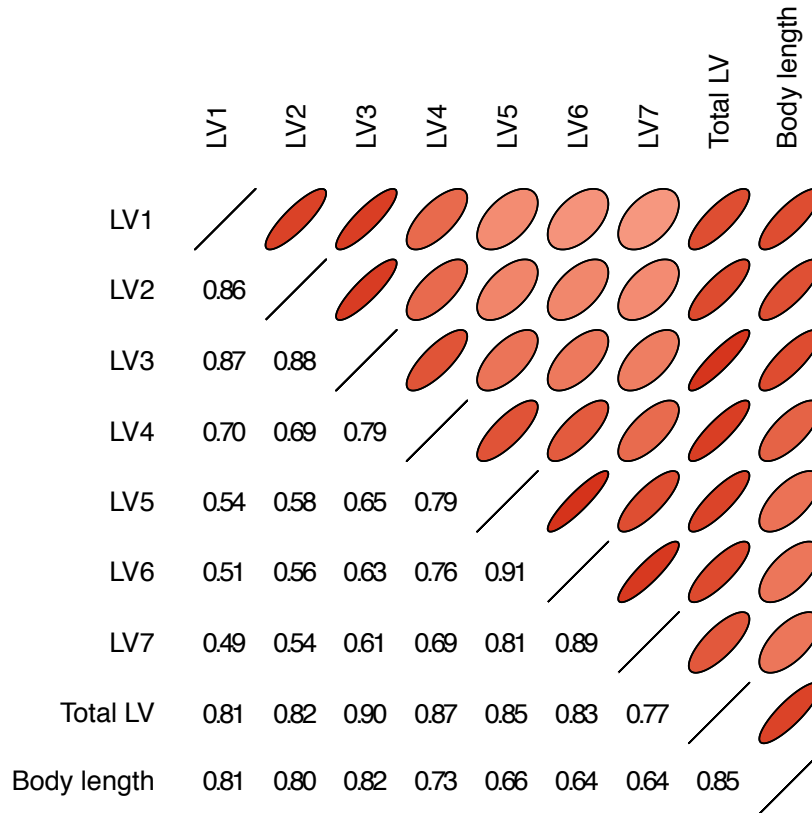

737 **Supplementary Figure S3. Body length is positively correlated with the lengths of lumbar**  
 738 **vertebrae (LV) 1 – 7.** Pearson correlations between the length of each lumbar vertebra and body  
 739 length from mole-rat x-ray data. Narrower ovals with darker shades of red indicate larger  
 740 Pearson correlations; correlation values are also given in the lower left triangle.  
 741

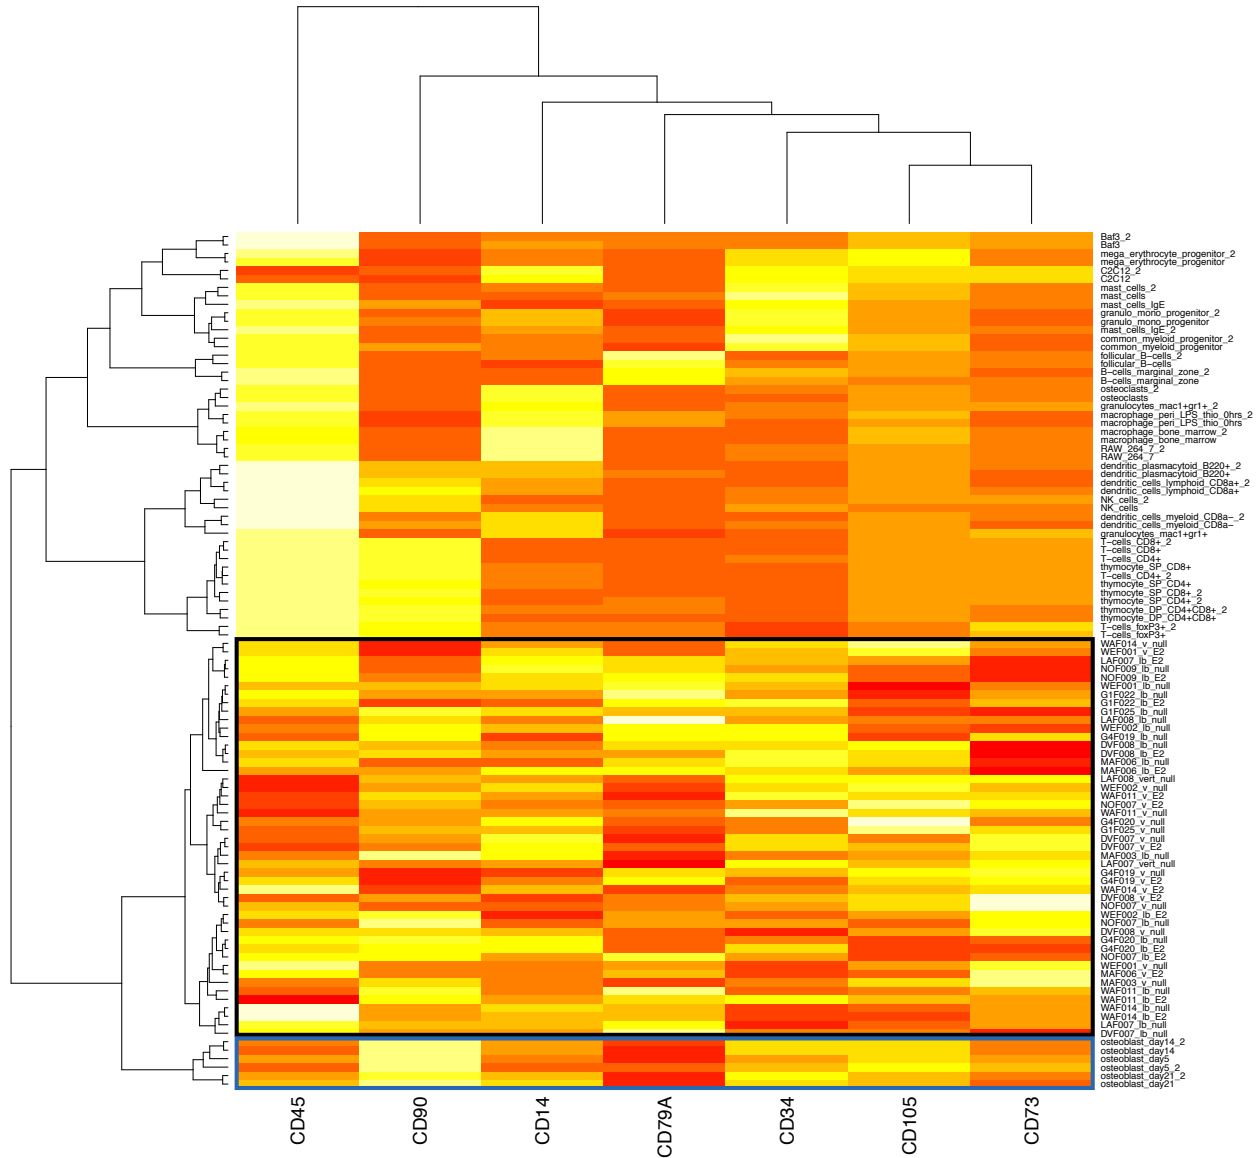

742 **Supplementary Figure S4. Mole-rat RNA-Seq samples cluster closest with purified mouse**  
 743 **osteoblasts, based on canonical bMSC markers.** Clustering was performed using Ward's  
 744 hierarchical clustering method on Euclidean distances of the quantile normalized expression of  
 745 the seven bMSC markers (out of 11 described [22]) that were quantified in both the mole-rat and  
 746 reference mouse [23] data sets. The black box indicates mole-rat samples, and the blue box  
 747 indicates mouse osteoblasts, a bMSC lineage cell type.  
 748

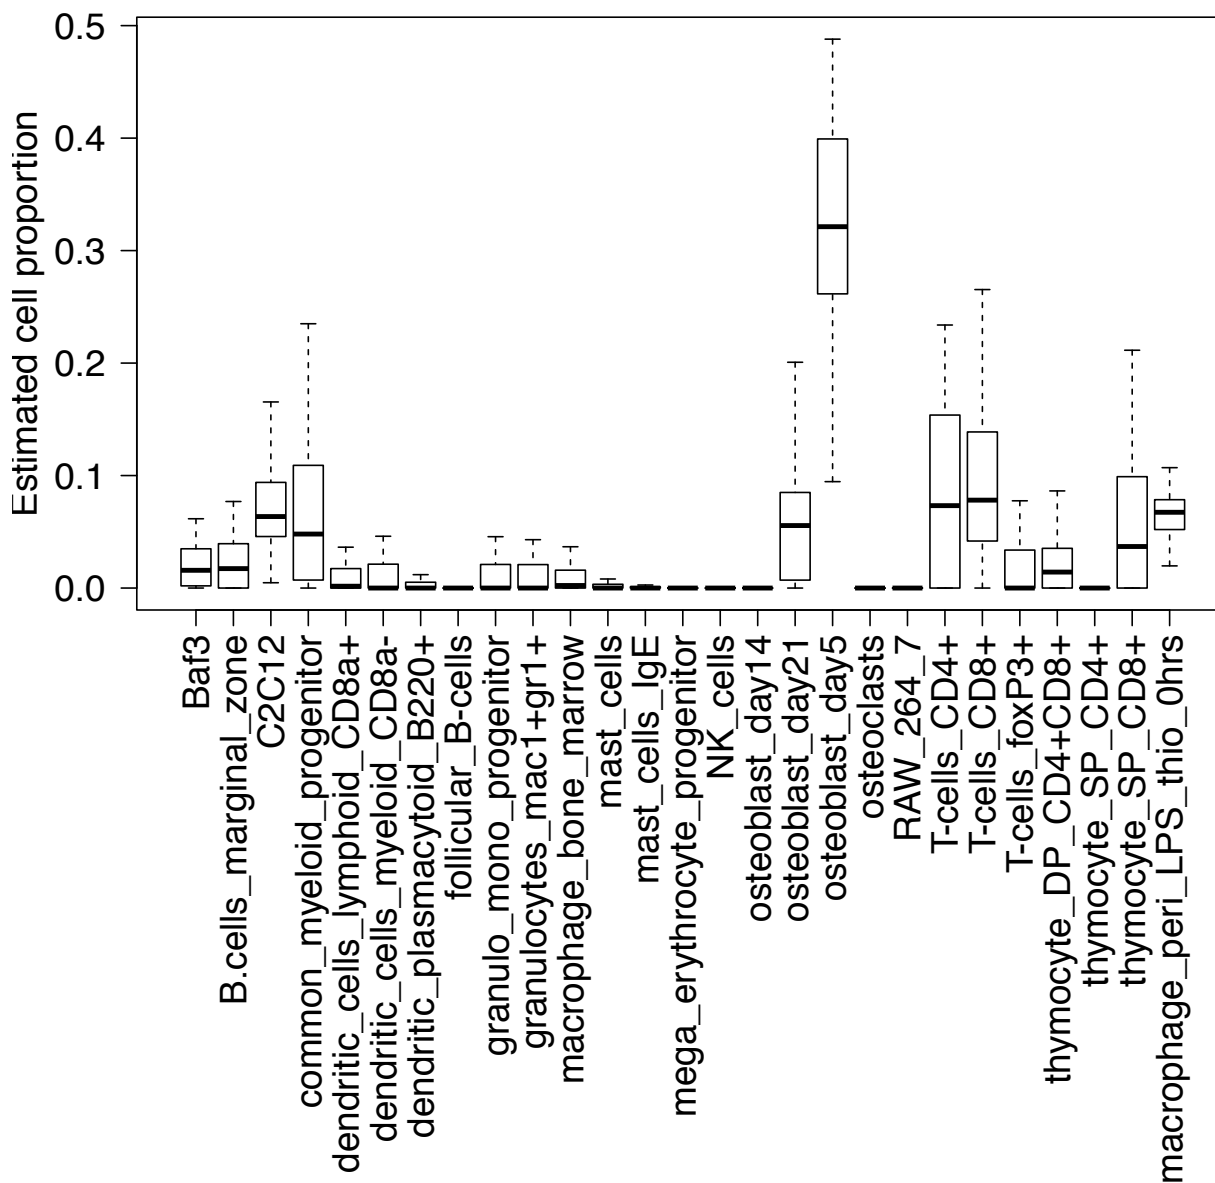

749 **Supplementary Figure S5. Estimated cell proportions for the 47 mole-rat RNA-Seq**  
 750 **samples.** Each box represents the interquartile range, with the median value depicted as a  
 751 horizontal bar. Whiskers extend to the most extreme estimates within 1.5x the interquartile  
 752 range. Cell proportions were estimated with CIBERSORT [24], based on reference gene  
 753 expression levels for 412 marker genes in 27 purified mouse cell types [23]. The predicted  
 754 predominant cell type in the mole-rat samples is most similar to early stage osteoblasts, which  
 755 are cells from the bMSC lineage.

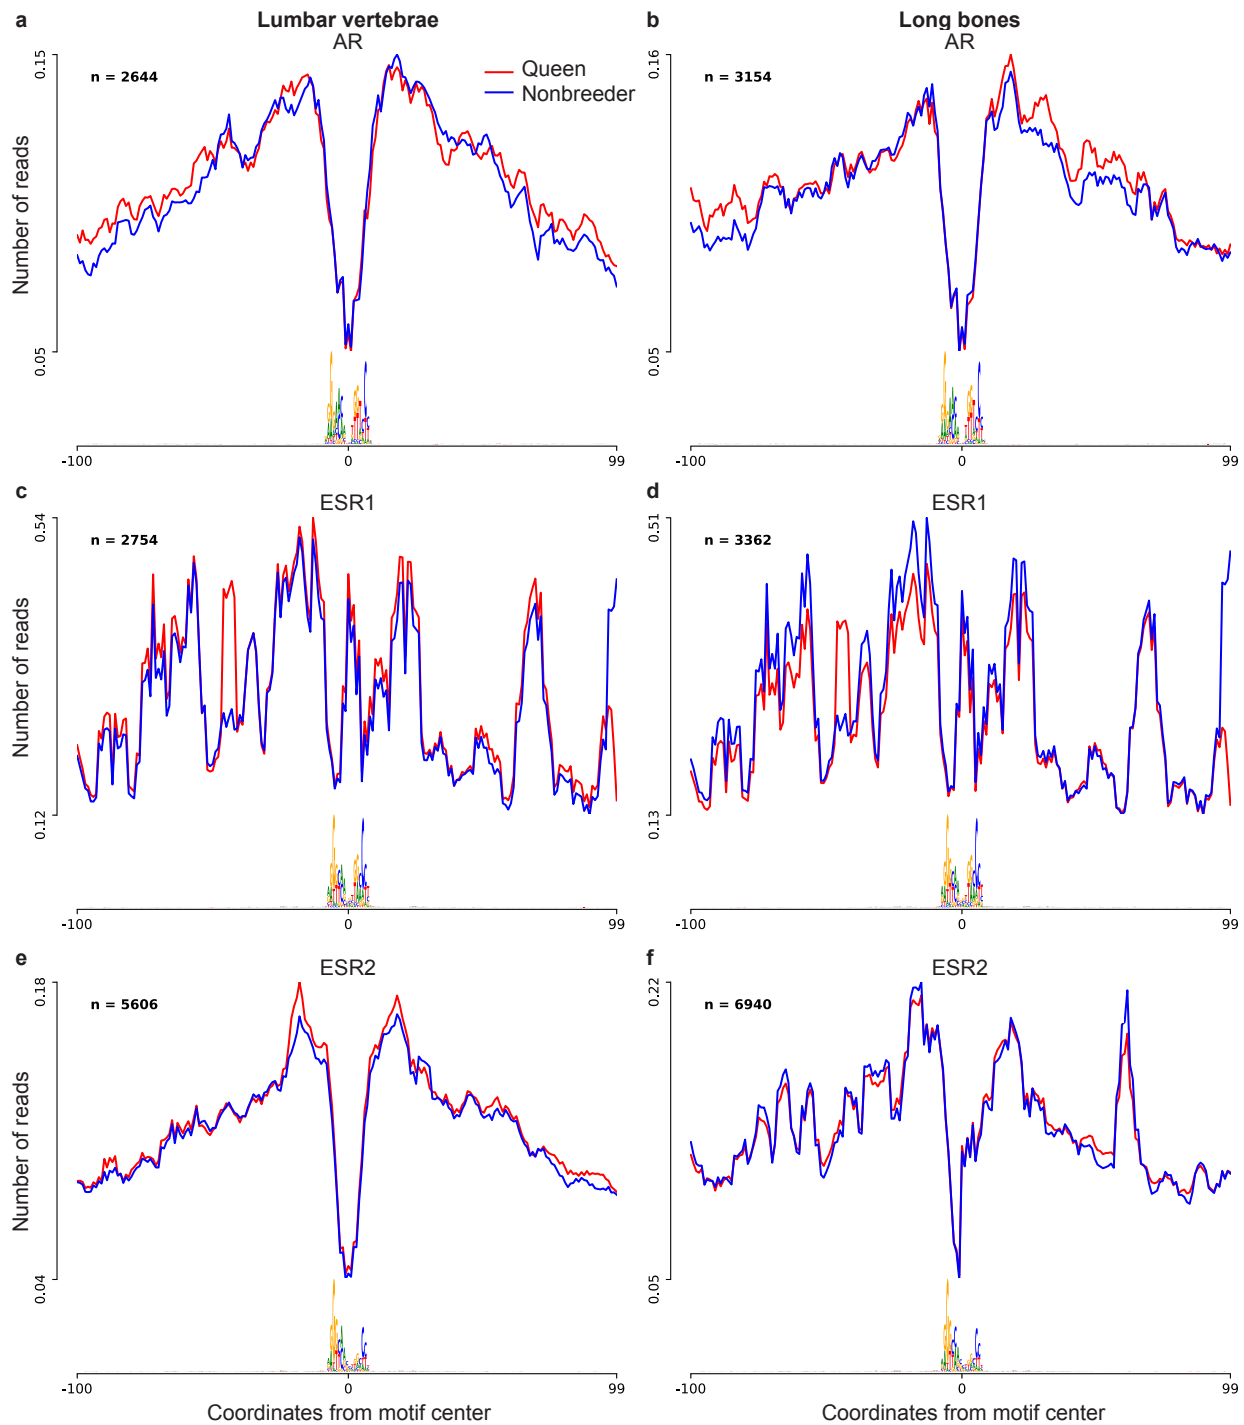

756 **Supplementary Figure S6. Footprint profiles of transcription factors androgen receptor**  
757 **(AR), estrogen receptor 1 (ESR1), and estrogen receptor 2 (ESR2).** Transcription factor  
758 footprints were profiled separately for lumbar vertebrae (n = 4; 2 queens and 2 nonbreeders) and  
759 for long bones (n = 4; 2 queens and 2 nonbreeders). Transcription factor activity was not  
760 significantly different between queens and nonbreeders in any of the three transcription factors,  
761 in either bone type (paired t-tests; all  $p > 0.05$ ).



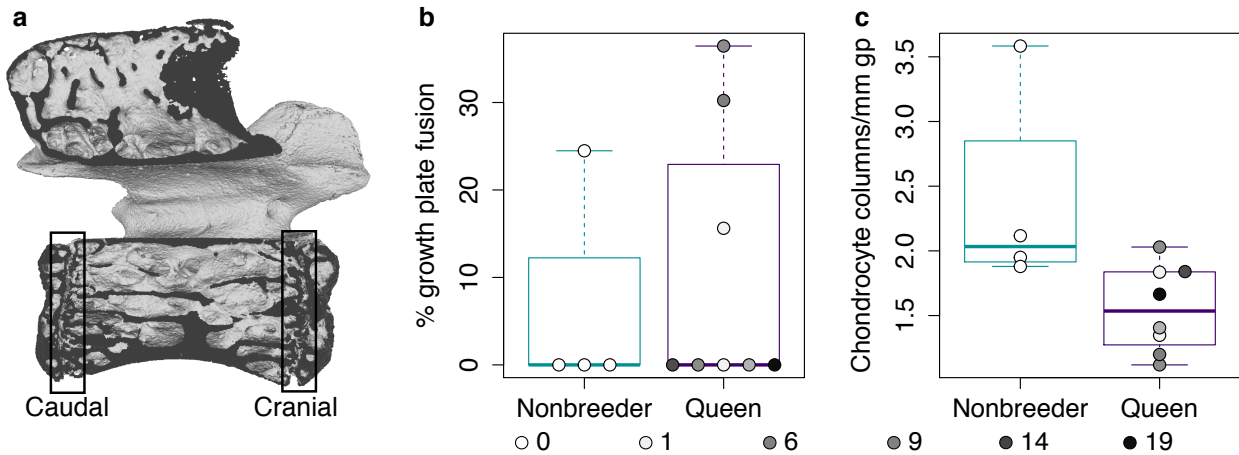

762 **Supplementary Figure S7. Growth potential in lumbar vertebra 7 (LV7).** (a)  $\mu$ CT scan of  
763 LV7 of a female Damaraland mole-rat. The boxes indicate the locations of the caudal and cranial  
764 growth plates. (b) The number of offspring produced by queens does not significantly predict  
765 growth plate fusion (quantified as the average of the caudal and cranial growth plates;  $\beta = 2.745$   
766  $\times 10^{-4}$ ,  $p = 0.970$ ,  $n = 12$ , controlling for age) or chondrocyte proliferation within the remaining  
767 growth plate ( $\beta = -0.033$ ,  $p = 0.293$ ,  $n = 12$ , controlling for age). Each box represents the  
768 interquartile range, with the median value depicted as a horizontal bar. Whiskers extend to the  
769 most extreme values within 1.5x of the interquartile range. Dots represent individual animals,  
770 and shading indicates each animal's total offspring number.

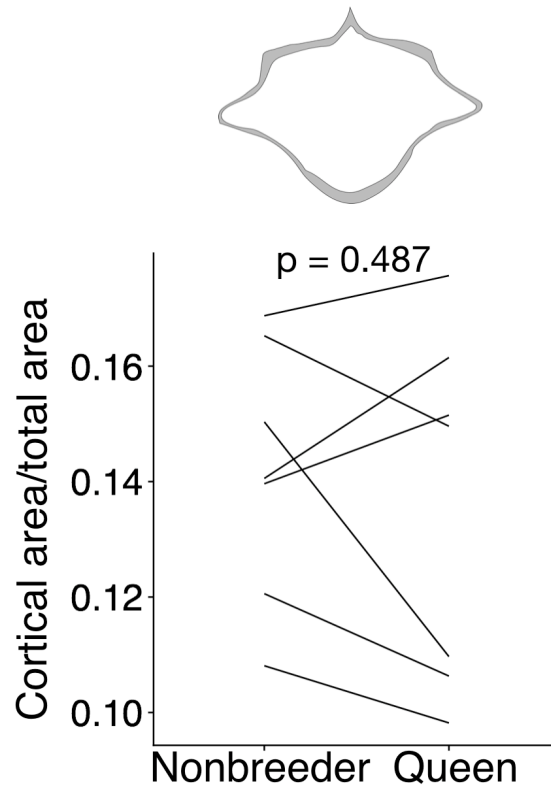

771 **Supplementary Figure S8. Queens do not exhibit reduced cortical area at the midsection of**  
772 **LV6.** At top, cross-section with area highlighted in gray shows the measure represented in the  
773 plot. Each line represents an age-matched nonbreeder and queen littermate pair. Queens and  
774 nonbreeders show no difference in cortical area/total area at the LV6 midsection (paired t-test of  
775 cortical area/total area,  $t = -0.741$ ,  $df = 6$ ,  $p = 0.487$ ).

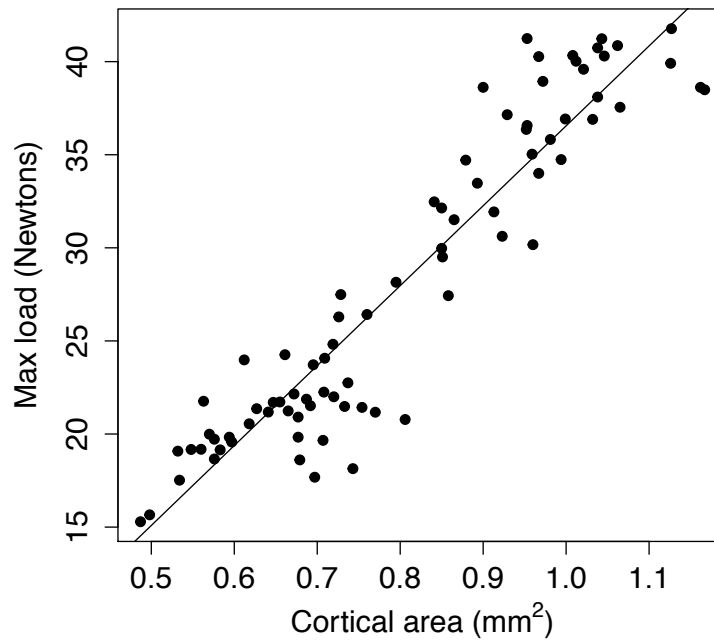

776 **Supplementary Figure S9. Relationship between max load and cortical area in mouse**  
777 **femurs.** Max load shows a highly linear relationship with cortical area across mouse femurs ( $R^2$   
778 = 0.88,  $p = 6.64 \times 10^{-38}$ ). Each dot represents a single mouse femur. Solid line indicates the best  
779 fit line. Data are from [37].

780 **References**

- 781 1. Wilson, E.O. (1971). The insect societies. The insect societies.
- 782 2. Keller, L., and Genoud, M. (1997). Extraordinary lifespans in ants: a test of  
783 evolutionary theories of ageing. *Nature* 389, 958-960.
- 784 3. Berndt, K.P., and Eichler, W. (1987). Die Pharaoameise, *Monomorium pharaonis*  
785 (L.)(Hym., Myrmicidae). *Mitteilungen aus dem Museum für Naturkunde in Berlin.*  
786 *Zoologisches Museum und Institut für Spezielle Zoologie (Berlin)* 63, 3-186.
- 787 4. Page Jr, R.E., and Peng, C.Y.-S. (2001). Aging and development in social insects with  
788 emphasis on the honey bee, *Apis mellifera* L. *Experimental gerontology* 36, 695-711.
- 789 5. Smith, C.R., Toth, A.L., Suarez, A.V., and Robinson, G.E. (2008). Genetic and genomic  
790 analyses of the division of labour in insect societies. *Nature Reviews Genetics* 9, 735-  
791 748.
- 792 6. Koenig, W.D., and Dickinson, J.L. (2016). Cooperative breeding in vertebrates:  
793 studies of ecology, evolution, and behavior, (Cambridge University Press).
- 794 7. Clutton-Brock, T., Hodge, S., Spong, G., Russell, A., Jordan, N., Bennett, N., Sharpe, L.,  
795 and Manser, M. (2006). Intrasexual competition and sexual selection in cooperative  
796 mammals. *Nature* 444, 1065-1068.
- 797 8. Huchard, E., English, S., Bell, M.B., Thavarajah, N., and Clutton-Brock, T. (2016).  
798 Competitive growth in a cooperative mammal. *Nature* 533, 532-534.
- 799 9. O'Riain, M., Jarvis, J., Alexander, R., Buffenstein, R., and Peeters, C. (2000).  
800 Morphological castes in a vertebrate. *Proceedings of the National Academy of*  
801 *Sciences* 97, 13194-13197.
- 802 10. Russell, A.F., Carlson, A.A., McIlrath, G.M., Jordan, N.R., and Clutton - Brock, T.  
803 (2004). Adaptive size modification by dominant female meerkats. *Evolution* 58,  
804 1600-1607.
- 805 11. Thorley, J., Katlein, N., Goddard, K., Zöttl, M., and Clutton-Brock, T. (2018).  
806 Reproduction triggers adaptive increases in body size in female mole-rats.  
807 *Proceedings of the Royal Society B: Biological Sciences* 285, 20180897.
- 808 12. Young, A.J., and Bennett, N.C. (2010). Morphological divergence of breeders and  
809 helpers in wild Damaraland mole - rat societies. *Evolution: International Journal of*  
810 *Organic Evolution* 64, 3190-3197.
- 811 13. Bens, M., Szafranski, K., Holtze, S., Sahm, A., Groth, M., Kestler, H.A., Hildebrandt, T.B.,  
812 and Platzer, M. (2018). Naked mole-rat transcriptome signatures of socially  
813 suppressed sexual maturation and links of reproduction to aging. *BMC biology* 16,  
814 77.
- 815 14. Mulugeta, E., Marion-Poll, L., Gentien, D., Ganswindt, S.B., Ganswindt, A., Bennett,  
816 N.C., Blackburn, E.H., Faulkes, C.G., and Heard, E. (2017). Molecular insights into the  
817 pathways underlying naked mole-rat eusociality. *bioRxiv*, 209932.
- 818 15. Sahm, A., Hoffmann, S., Koch, P., Henning, Y., Bens, M., Groth, M., Burda, H., Begall, S.,  
819 Ting, S., and Goetz, M. (2020). Status-dependent aging rates in long-lived, social  
820 mole-rats are shaped by HPA stress axis. *bioRxiv*.
- 821 16. Bennett, N.C., and Faulkes, C.G. (2000). African mole-rats: ecology and eusociality,  
822 (Cambridge University Press).
- 823 17. Jarvis, J. (1981). Eusociality in a mammal: cooperative breeding in naked mole-rat  
824 colonies. *Science* 212, 571-573.

- 825 18. Jarvis, J., and Bennett, N. (1993). Eusociality has evolved independently in two  
826 genera of bathyergid mole-rats—but occurs in no other subterranean mammal.  
827 *Behavioral Ecology and Sociobiology* 33, 253-260.
- 828 19. Bennett, N., Faulkes, C., and Molteno, A. (1996). Reproductive suppression in  
829 subordinate, non-breeding female Damaraland mole-rats: two components to a  
830 lifetime of socially induced infertility. *Proceedings of the Royal Society of London.*  
831 *Series B: Biological Sciences* 263, 1599-1603.
- 832 20. Snyman, P., Jackson, C.R., and Bennett, N.C. (2006). Do dispersing non-reproductive  
833 female Damaraland mole-rats, *Cryptomys damarensis* (Rodentia: Bathyergidae)  
834 exhibit spontaneous or induced ovulation? *Physiology & behavior* 87, 88-94.
- 835 21. Dengler - Crish, C.M., and Catania, K.C. (2009). Cessation of reproduction - related  
836 spine elongation after multiple breeding cycles in female naked mole - rats. *The*  
837 *Anatomical Record: Advances in Integrative Anatomy and Evolutionary Biology:*  
838 *Advances in Integrative Anatomy and Evolutionary Biology* 292, 131-137.
- 839 22. Dominici, M., Le Blanc, K., Mueller, I., Slaper-Cortenbach, I., Marini, F., Krause, D.,  
840 Deans, R., Keating, A., Prockop, D., and Horwitz, E. (2006). Minimal criteria for  
841 defining multipotent mesenchymal stromal cells. *The International Society for*  
842 *Cellular Therapy position statement. Cytotherapy* 8, 315-317.
- 843 23. Hume, D.A., Summers, K.M., Raza, S., Baillie, J.K., and Freeman, T.C. (2010).  
844 Functional clustering and lineage markers: insights into cellular differentiation and  
845 gene function from large-scale microarray studies of purified primary cell  
846 populations. *Genomics* 95, 328-338.
- 847 24. Newman, A.M., Liu, C.L., Green, M.R., Gentles, A.J., Feng, W., Xu, Y., Hoang, C.D., Diehn,  
848 M., and Alizadeh, A.A. (2015). Robust enumeration of cell subsets from tissue  
849 expression profiles. *Nature methods* 12, 453.
- 850 25. Redlich, K., and Smolen, J.S. (2012). Inflammatory bone loss: pathogenesis and  
851 therapeutic intervention. *Nature reviews Drug discovery* 11, 234-250.
- 852 26. Darden, A.G., Ries, W.L., Wolf, W.C., Rodriguiz, R.M., and Key Jr, L.L. (1996).  
853 Osteoclastic superoxide production and bone resorption: stimulation and inhibition  
854 by modulators of NADPH oxidase. *Journal of Bone and Mineral Research* 11, 671-  
855 675.
- 856 27. Datta, H., Rathod, H., Manning, P., Turnbull, Y., and McNeil, C. (1996). Parathyroid  
857 hormone induces superoxide anion burst in the osteoclast: evidence for the direct  
858 instantaneous activation of the osteoclast by the hormone. *Journal of endocrinology*  
859 149, 269-275.
- 860 28. Key, L., Ries, W., Taylor, R., Hays, B., and Pitzer, B. (1990). Oxygen derived free  
861 radicals in osteoclasts: the specificity and location of the nitroblue tetrazolium  
862 reaction. *Bone* 11, 115-119.
- 863 29. Key, L., Wolf, W., Gundberg, C., and Ries, W. (1994). Superoxide and bone resorption.  
864 *Bone* 15, 431-436.
- 865 30. Segeletz, S., and Hoflack, B. (2016). Proteomic approaches to study osteoclast  
866 biology. *Proteomics* 16, 2545-2556.
- 867 31. Bennett, N. (1994). Reproductive suppression in social *Cryptomys damarensis*  
868 colonies—a lifetime of socially - induced sterility in males and females (Rodentia:  
869 Bathyergidae). *Journal of Zoology* 234, 25-39.

- 870 32. Crawford, L., Monod, A., Chen, A.X., Mukherjee, S., and Rabadán, R. (2016).  
871 Functional data analysis using a topological summary statistic: the smooth Euler  
872 characteristic transform. arXiv preprint arXiv:1611.06818.
- 873 33. Kilborn, S.H., Trudel, G., and Uthoff, H. (2002). Review of growth plate closure  
874 compared with age at sexual maturity and lifespan in laboratory animals. *Journal of*  
875 *the American Association for Laboratory Animal Science* 41, 21-26.
- 876 34. Kovacs, C.S. (2016). Maternal mineral and bone metabolism during pregnancy,  
877 lactation, and post-weaning recovery. *Physiological reviews* 96, 449-547.
- 878 35. Schmidt, C.M., Jarvis, J.U., and Bennett, N.C. (2013). The long-lived queen:  
879 reproduction and longevity in female eusocial Damaraland mole-rats (*Fukomys*  
880 *damarensis*). *African Zoology* 48, 193-196.
- 881 36. Szulc, P., Seeman, E., Duboeuf, F., Sornay - Rendu, E., and Delmas, P.D. (2006). Bone  
882 fragility: failure of periosteal apposition to compensate for increased endocortical  
883 resorption in postmenopausal women. *Journal of bone and mineral research* 21,  
884 1856-1863.
- 885 37. Jepsen, K.J., Akkus, O.J., Majeska, R.J., and Nadeau, J.H. (2003). Hierarchical  
886 relationship between bone traits and mechanical properties in inbred mice.  
887 *Mammalian Genome* 14, 97-104.
- 888 38. Henry, E.C., Dengler-Crish, C.M., and Catania, K.C. (2007). Growing out of a caste-  
889 reproduction and the making of the queen mole-rat. *Journal of Experimental Biology*  
890 210, 261-268.
- 891 39. Faulkes, C.G., and Bennett, N.C. (2016). Damaraland and naked mole-rats:  
892 convergence of social evolution. *Cooperative breeding in vertebrates*, 338-352.
- 893 40. Cutler Jr, G. (1997). The role of estrogen in bone growth and maturation during  
894 childhood and adolescence. *The Journal of steroid biochemistry and molecular*  
895 *biology* 61, 141-144.
- 896 41. Khalid, A.B., and Krum, S.A. (2016). Estrogen receptors alpha and beta in bone. *Bone*  
897 87, 130-135.
- 898 42. Juul, A. (2001). The effects of oestrogens on linear bone growth. *Apmis* 109, S124-  
899 S134.
- 900 43. Houslay, T.M., Vullioud, P., Zöttl, M., and Clutton-Brock, T.H. (2020). Benefits of  
901 cooperation in captive Damaraland mole-rats. *Behavioral Ecology*.
- 902 44. Clutton-Brock, T.H., and Manser, M. (2016). Meerkats: cooperative breeding in the  
903 Kalahari. *Cooperative breeding in vertebrates* 294, 317.
- 904 45. Morseth, B., Emaus, N., and Jørgensen, L. (2011). Physical activity and bone: The  
905 importance of the various mechanical stimuli for bone mineral density. A review.  
906 *Norsk epidemiologi* 20.
- 907 46. Jarvis, J.U., O'Riain, M.J., Bennett, N.C., and Sherman, P.W. (1994). Mammalian  
908 eusociality: a family affair. *Trends in Ecology & Evolution* 9, 47-51.
- 909 47. Pinto, M., Jepsen, K., Terranova, C., and Buffenstein, R. (2010). Lack of sexual  
910 dimorphism in femora of the eusocial and hypogonadic naked mole-rat: a novel  
911 animal model for the study of delayed puberty on the skeletal system. *Bone* 46, 112-  
912 120.

- 913 48. Burda, H., Honeycutt, R.L., Begall, S., Locker-Grütjen, O., and Scharff, A. (2000). Are  
914 naked and common mole-rats eusocial and if so, why? *Behavioral Ecology and*  
915 *Sociobiology* 47, 293-303.
- 916 49. Rodrigues, M.A., and Flatt, T. (2016). Endocrine uncoupling of the trade-off between  
917 reproduction and somatic maintenance in eusocial insects. *Current opinion in insect*  
918 *science* 16, 1-8.
- 919 50. Rueppell, O., Aumer, D., and Moritz, R.F. (2016). Ties between ageing plasticity and  
920 reproductive physiology in honey bees (*Apis mellifera*) reveal a positive relation  
921 between fecundity and longevity as consequence of advanced social evolution.  
922 *Current opinion in insect science* 16, 64-68.
- 923 51. Zöttl, M., Vulliod, P., Mendonça, R., Ticó, M.T., Gaynor, D., Mitchell, A., and Clutton-  
924 Brock, T. (2016). Differences in cooperative behavior among Damaraland mole rats  
925 are consequences of an age-related polyethism. *Proceedings of the National*  
926 *Academy of Sciences* 113, 10382-10387.
- 927 52. Schneider, C.A., Rasband, W.S., and Eliceiri, K.W. (2012). NIH Image to ImageJ: 25  
928 years of image analysis. *Nature methods* 9, 671-675.
- 929 53. Martin, M. (2011). Cutadapt removes adapter sequences from high-throughput  
930 sequencing reads. *EMBnet. journal* 17, 10-12.
- 931 54. Fang, X., Seim, I., Huang, Z., Gerashchenko, M.V., Xiong, Z., Turanov, A.A., Zhu, Y.,  
932 Lobanov, A.V., Fan, D., and Yim, S.H. (2014). Adaptations to a subterranean  
933 environment and longevity revealed by the analysis of mole rat genomes. *Cell*  
934 *reports* 8, 1354-1364.
- 935 55. Dobin, A., Davis, C.A., Schlesinger, F., Drenkow, J., Zaleski, C., Jha, S., Batut, P.,  
936 Chaisson, M., and Gingeras, T.R. (2013). STAR: ultrafast universal RNA-seq aligner.  
937 *Bioinformatics* 29, 15-21.
- 938 56. Anders, S., Pyl, P.T., and Huber, W. (2014). HTSeq—A Python framework to work with  
939 high-throughput sequencing data. *Bioinformatics*, btu638.
- 940 57. Wagner, G.P., Kin, K., and Lynch, V.J. (2012). Measurement of mRNA abundance  
941 using RNA-seq data: RPKM measure is inconsistent among samples. *Theory in*  
942 *biosciences* 131, 281-285.
- 943 58. Law, C.W., Chen, Y., Shi, W., and Smyth, G.K. (2014). Voom: precision weights unlock  
944 linear model analysis tools for RNA-seq read counts. *Genome biology* 15, R29.
- 945 59. Robinson, M.D., and Oshlack, A. (2010). A scaling normalization method for  
946 differential expression analysis of RNA-seq data. *Genome biology* 11, R25.
- 947 60. Anders, S., and Huber, W. (2010). Differential expression analysis for sequence  
948 count data. *Genome Biol* 11, R106.
- 949 61. Smyth, G.K. (2005). Limma: linear models for microarray data. In *Bioinformatics and*  
950 *computational biology solutions using R and Bioconductor*. (Springer), pp. 397-420.
- 951 62. Akdemir, D., and Okeke, U. (2015). EMMREML: Fitting mixed models with known  
952 covariance structures. R package version 3.
- 953 63. Storey, J.D., and Tibshirani, R. (2003). Statistical significance for genomewide  
954 studies. *Proc Natl Acad Sci U S A* 100, 9440-9445.
- 955 64. Raudvere, U., Kolberg, L., Kuzmin, I., Arak, T., Adler, P., Peterson, H., and Vilo, J.  
956 (2019). g: Profiler: a web server for functional enrichment analysis and conversions  
957 of gene lists (2019 update). *Nucleic acids research* 47, W191-W198.

- 958 65. McKenna, A., Hanna, M., Banks, E., Sivachenko, A., Cibulskis, K., Kernytsky, A.,  
959 Garimella, K., Altshuler, D., Gabriel, S., and Daly, M. (2010). The Genome Analysis  
960 Toolkit: a MapReduce framework for analyzing next-generation DNA sequencing  
961 data. *Genome research* 20, 1297-1303.
- 962 66. Danecek, P., Auton, A., Abecasis, G., Albers, C.A., Banks, E., DePristo, M.A., Handsaker,  
963 R.E., Lunter, G., Marth, G.T., and Sherry, S.T. (2011). The variant call format and  
964 VCFtools. *Bioinformatics* 27, 2156-2158.
- 965 67. Browning, S.R., and Browning, B.L. (2007). Rapid and accurate haplotype phasing  
966 and missing-data inference for whole-genome association studies by use of localized  
967 haplotype clustering. *The American Journal of Human Genetics* 81, 1084-1097.
- 968 68. Phinney, D.G., Kopen, G., Isaacson, R.L., and Prockop, D.J. (1999). Plastic adherent  
969 stromal cells from the bone marrow of commonly used strains of inbred mice:  
970 variations in yield, growth, and differentiation. *Journal of cellular biochemistry* 72,  
971 570-585.
- 972 69. Buenrostro, J.D., Giresi, P.G., Zaba, L.C., Chang, H.Y., and Greenleaf, W.J. (2013).  
973 Transposition of native chromatin for fast and sensitive epigenomic profiling of  
974 open chromatin, DNA-binding proteins and nucleosome position. *Nature methods*  
975 10, 1213.
- 976 70. Corces, M.R., Trevino, A.E., Hamilton, E.G., Greenside, P.G., Sinnott-Armstrong, N.A.,  
977 Vesuna, S., Satpathy, A.T., Rubin, A.J., Montine, K.S., and Wu, B. (2017). An improved  
978 ATAC-seq protocol reduces background and enables interrogation of frozen tissues.  
979 *Nature methods* 14, 959.
- 980 71. Krueger, F. (2015). Trim Galore.  
981 [http://www.bioinformatics.babraham.ac.uk/projects/trim\\_galore/](http://www.bioinformatics.babraham.ac.uk/projects/trim_galore/).
- 982 72. Li, H., and Durbin, R. (2010). Fast and accurate long-read alignment with Burrows-  
983 Wheeler transform. *Bioinformatics* 26, 589-595.
- 984 73. Zhang, Y., Liu, T., Meyer, C.A., Eeckhoute, J., Johnson, D.S., Bernstein, B.E., Nusbaum,  
985 C., Myers, R.M., Brown, M., and Li, W. (2008). Model-based analysis of ChIP-Seq  
986 (MACS). *Genome biology* 9, R137.
- 987 74. Heinz, S., Benner, C., Spann, N., Bertolino, E., Lin, Y.C., Laslo, P., Cheng, J.X., Murre, C.,  
988 Singh, H., and Glass, C.K. (2010). Simple combinations of lineage-determining  
989 transcription factors prime cis-regulatory elements required for macrophage and B  
990 cell identities. *Molecular cell* 38, 576-589.
- 991 75. Li, Z., Schulz, M.H., Look, T., Begemann, M., Zenke, M., and Costa, I.G. (2019).  
992 Identification of transcription factor binding sites using ATAC-seq. *Genome biology*  
993 20, 45.
- 994 76. Quinlan, A.R., and Hall, I.M. (2010). BEDTools: a flexible suite of utilities for  
995 comparing genomic features. *Bioinformatics* 26, 841-842.
- 996 77. Sandelin, A., Alkema, W., Engström, P., Wasserman, W.W., and Lenhard, B. (2004).  
997 JASPAR: an open - access database for eukaryotic transcription factor binding  
998 profiles. *Nucleic acids research* 32, D91-D94.
- 999 78. Boyer, D.M., Puente, J., Gladman, J.T., Glynn, C., Mukherjee, S., Yapuncich, G.S., and  
1000 Daubechies, I. (2015). A new fully automated approach for aligning and comparing  
1001 shapes. *The Anatomical Record* 298, 249-276.



- 1002 79. Dimitriadou, E., Hornik, K., Leisch, F., Meyer, D., and Weingessel, A. (2008). Misc  
1003 functions of the Department of Statistics (e1071), TU Wien. R package 1, 5-24.  
1004 80. Golland, P., Liang, F., Mukherjee, S., and Panchenko, D. (2005). Permutation tests for  
1005 classification. International Conference on Computational Learning Theory, 501-  
1006 515.  
1007 81. Treece, G.M. (2019). <http://mi.eng.cam.ac.uk/~gmt11/stradview>.  
1008 82. Treece, G.M., Gee, A.H., Mayhew, P., and Poole, K.E. (2010). High resolution cortical  
1009 bone thickness measurement from clinical CT data. Medical image analysis 14, 276-  
1010 290.  
1011 83. Therneau, T.M. (2020). A Package for Survival Analysis in R. R package version 3.1-  
1012 12, available at <https://CRAN.R-project.org/package=survival>.  
1013
